# Supplementary material for: Synthesis of a SO3H-bearing carbonaceous solid catalyst, PEG–SAC: application for the easy access to a diversified library of pyran derivatives
Source: Royal Society of Chemistry journal article supplement (doi:10.1039/c3ra42352b), 2013-01-01
Supplement: c3ra42352b.pdf [file c3ra42352b.pdf]

# Synthesis of SO<sub>3</sub>H-bearing carbonaceous solid catalyst, PEG-SAC: Application for the easy access of a diversified library of pyran derivatives

Sanjay Paul<sup>a</sup>, Sirshendu Ghosh<sup>b</sup>, Pranabes Bhattacharyya<sup>a</sup>, Asish R. Das<sup>a,\*</sup>

<sup>a</sup>Department of Chemistry, University of Calcutta, Kolkata-700009, India

<sup>b</sup>Department of Materials Science, Indian Association for the Cultivation of Science, Kolkata, 700032, India

\*Corresponding author. Tel.: +913323501014, +919433120265; fax: +913323519754;

E-mail address: [ardchem@caluniv.ac.in](mailto:ardchem@caluniv.ac.in), [ardas66@rediffmail.com](mailto:ardas66@rediffmail.com) (A R Das)

## Materials and Methods

<sup>1</sup>H-NMR and <sup>13</sup>C-NMR spectral analysis were carried out on Bruker-Advance Digital 300 MHz and 75 MHz instruments; tetramethylsilane (TMS) was used as internal standard. Infrared spectra were recorded in KBr pellets in reflection mode on a Perkin Elmer RX-1 FTIR spectrophotometer. Sonication was performed by UIP 1000 hd (20KHz, 1000W). Mesoporous structure of the catalyst high-resolution transmission electron microscope (HRTEM; JEOL 2010). X-ray powder diffraction study was carried out on a Philips PW-1830 X-Ray diffractometer at a voltage of 35 kV and current 25mA. Melting points were recorded on a Köfler Block apparatus. Merck aluminum-blocked silica gel plates coated with silica gel G were used for analytical TLC and monitored under UV light and also by exposure to iodine vapor. Synthetic grade chemicals from Sigma-Aldrich, Spectrochem and E-Merck were used for the preparation of the catalyst and for carrying out the organic reactions. All the solvents used in the reaction were distilled and dried properly.

| Element | Peak area | Area Sigma | k factor | Abs Corr. | Weight % | Atomic % |
|---------|-----------|------------|----------|-----------|----------|----------|
| C K     | 1913      | 82         | 1.504    | 1.000     | 85.18    | 95.22    |
| O K     | 178       | 24         | 1.309    | 1.000     | 8.89     | 6.84     |
| S K     | 77        | 25         | 1.047    | 1.000     | 5.93     | 2.28     |
| Totals  |           |            |          |           | 100.00   |          |

**Table S1:** Elemental analysis of the PEG-SAC catalyst

**3-Amino-5-oxo-1-phenyl-1,5-dihydro-pyrano[2,3-c]chromene-2-carbonitrile (2a)** : Characteristic: Yellow crystalline solid; mp: 248 °C; IR (KBr): 3438, 3285, 3175, 2191, 1736, 1658, 1599, 1409, 1274, 1163, 1114 cm<sup>-1</sup>; <sup>1</sup>H NMR (300 MHz; DMSO-d<sub>6</sub>): δ 5.06 (s, 1H, CH), 7.21-7.65 (m, 11H, Ar, NH<sub>2</sub>); <sup>13</sup>C NMR (75 MHz, DMSO-d<sub>6</sub>): δ 37.6, 57.1, 116.5, 117.0, 117.8, 119.6, 124.8, 125.2, 126.5, 127.5, 129.1, 130.3, 134.3, 143.1, 150.3, 154.1, 159.0; HRMS Calcd for C<sub>19</sub>H<sub>12</sub>N<sub>2</sub>O<sub>3</sub> ([M+H]<sup>+</sup>) 317.0927 found : 317.0922

**3-Amino-1-(4-nitro-phenyl)-5-oxo-1,5-dihydro-pyrano[2,3-c]chromene-2-carbonitrile (2b):** Characteristic: Yellow crystalline solid; mp: 256 °C; IR (KBr): 3403, 2372, 2156, 1746, 1619, 1516, 1411, 1343, 1161, 1020 cm<sup>-1</sup>; <sup>1</sup>H NMR ( 300 MHz, DMSO-d<sub>6</sub>): δ 5.33(s, 1H, CH), 7.16-7.45 (m, 6H, Ar, NH<sub>2</sub>) , 7.67(d, J=7.8 Hz, 2H) , 8.14 (d, J=7.8 Hz, 2H, Ar); <sup>13</sup>C NMR (75 MHz, DMSO-d<sub>6</sub>): δ 37.1, 55.8, 116.5, 116.9, 118.7, 121.3, 124.2, 125.0, 128.9, 129.0, 129.6, 129.8, 133.6, 139.8, 151.5, 155.0, 159.0; HR-MS Calcd for C<sub>19</sub>H<sub>11</sub>N<sub>3</sub>O<sub>5</sub> ([M+H]<sup>+</sup>) 362.0778 found : 362.0774

**3-Amino-1-(4-methoxy-phenyl)-5-oxo-1,5-dihydro-pyrano[2,3-c]chromene-2-carbonitrile (2c):** Characteristic: Yellow crystalline solid; mp: 234 °C; IR (KBr): 3428, 3290, 3179, 2374, 2198, 2101, 1727, 1655, 1602, 1509, 1456, 1407, 1259, 1166, 1117, 1027, 750, 630, 544 cm<sup>-1</sup>. <sup>1</sup>H NMR (300 MHz, DMSO-d<sub>6</sub>): δ 3.62 (s, 3H, OCH<sub>3</sub>), 4.97 (s, 1H, CH), 6.78-7.49 (m, 10H, Ar, NH<sub>2</sub>) ; <sup>13</sup>C NMR (75 MHz, DMSO-

d<sub>6</sub>): δ 36.9, 55.1, 57.4, 114.4, 116.4, 117.0, 119.7, 124.7, 125.2, 126.8, 128.7, 130.3, 134.0, 135.3, 150.3, 154.1, 158.5, 158.9; HR-MS Calcd for C<sub>20</sub>H<sub>14</sub>N<sub>2</sub>O<sub>4</sub> ([M+H]<sup>+</sup>) : 347.1033 found : 347.1017

**3-Amino-1-(4-bromo-phenyl)-5-oxo-1,5-dihydro-pyrano[2,3-c]chromene-2-carbonitrile (2d):**

Characteristic: Yellow crystalline solid; mp: 210 °C; IR (KBr):3429, 3292, 3177, 2921, 2864, 2193, 1727, 1653, 1599, 1406, 1297, 1167, 1114, 1009,830, 751 cm<sup>-1</sup>; <sup>1</sup>H NMR (300 MHz, DMSO-d<sub>6</sub>): δ 5.11(s, 1H, CH), 7.17-7.49 (m, 10H, Ar, NH<sub>2</sub>); <sup>13</sup>C NMR (75 MHz, DMSO-d<sub>6</sub>): δ 36.9, 56.58, 116.5, 116.9, 119.5, 120.7, 124.8, 125.1, 125.8, 129.8, 130.4, 131.4, 131.9, 134.5, 142.6, 150.3, 154.1, 159.0; HR-MS Calcd for C<sub>19</sub>H<sub>11</sub>BrN<sub>2</sub>O<sub>3</sub> ([M+H]<sup>+</sup>) : 395.0032 found : 395.0035

**3-Amino-5-oxo-1-p-tolyl-1,5-dihydro-pyrano[2,3-c]chromene-2-carbonitrile (2e):** Characteristic:

Yellow crystalline solid; mp: 231 °C; IR (KBr):3430, 3296, 3173, 2198, 1727, 1659, 1597, 1406, 1295, 1165, 1116, 753 cm<sup>-1</sup>; <sup>1</sup>H NMR (300 MHz, DMSO-d<sub>6</sub>): δ 2.14 (s, 3H, CH<sub>3</sub>), 4.96 ((s, 1H, CH), 7.01-7.44(m, 10H, Ar, NH<sub>2</sub>); <sup>13</sup>C NMR (75 MHz, DMSO-d<sub>6</sub>): δ 20.7, 37.3, 57.3, 116.4, 117.0, 119.6, 124.7, 125.2, 126.7, 127.4, 129.6, 130.3, 134.1, 136.7, 140.2, 150.3, 154.1, 158.9; HR-MS Calcd for C<sub>20</sub>H<sub>14</sub>N<sub>2</sub>O<sub>3</sub> ([M+H]<sup>+</sup>) : 331.1083 found : 331.1082

**3-Amino-1-naphthalen-2-yl-5-oxo-1,5-dihydro-pyrano[2,3-c]chromene-2-carbonitrile (2f):**

Characteristic: Yellow crystalline solid; mp: 276 °C; IR (KBr): 3427, 2924, 2852, 2195, 1731, 1657, 1602, 1454, 1407, 1302, 1173, 1121 cm<sup>-1</sup> ; <sup>1</sup>H NMR (300 MHz, DMSO-d<sub>6</sub>): δ 5.26(s, 1H, CH), 7.23-7.48 (m, 9H, Ar, NH<sub>2</sub>), 7.85 (d, J=8.4Hz, 3H, Ar), 7.94 (s, 1H, Ar) ; <sup>13</sup>C NMR (75 MHz, DMSO-d<sub>6</sub>): δ 37.9, 57.0, 116.5, 117.1, 117.8, 119.7, 124.8, 125.2, 125.6, 126.1, 126.2, 126.3, 126.6, 127.7, 127.9, 129.0, 130.4, 132.3, 133.1, 134.4, 140.5, 150.3, 154.2, 159.0 ; HR-MS Calcd for C<sub>23</sub>H<sub>14</sub>N<sub>2</sub>O<sub>3</sub> ([M+H]<sup>+</sup>) : 367.1083 found : 367.1087

**3-Amino-1-(4-fluoro-phenyl)-5-oxo-1,5-dihydro-pyrano[2,3-c]chromene-2-carbonitrile (2g):**

Characteristic: Yellow crystalline solid; mp: 203 °C; IR (KBr):3442, 3283, 3174, 1739, 1661, 1660, 1505, 1453, 1410, 1226, 1163, 1114, 1058, 997, 843, 750cm<sup>-1</sup>; <sup>1</sup>H NMR (300 MHz, DMSO-d<sub>6</sub>): δ 5.12(s, 1H,

CH), 7.07-7.46 (m, 10H, Ar, NH<sub>2</sub>); <sup>13</sup>C NMR (75 MHz, DMSO-d<sub>6</sub>): δ 36.8, 56.9, 115.7, 115.9, 116.5, 116.9, 117.8, 119.6, 124.8, 125.2, 126.1, 129.6, 129.7, 130.4, 134.4, 139.4, 150.3, 154.1 ; HR-MS Calcd for C<sub>19</sub>H<sub>11</sub>FN<sub>2</sub>O<sub>3</sub> ([M+H]<sup>+</sup>) : 335.0833 found : 335.0830

**3-Amino-1-(4-cyano-phenyl)-5-oxo-1,5-dihydro-pyrano[2,3-c]chromene-2-carbonitrile (2h):**

Characteristic: Yellow crystalline solid; mp: 242 °C; IR (KBr):3323, 3198, 2234, 2192, 1741, 1665, 1602, 1411, 1160, 1117, 762 cm<sup>-1</sup>; <sup>1</sup>H NMR (300 MHz, DMSO-d<sub>6</sub>): δ 5.25 (s, 1H, CH), 7.16-7.78 (m, 10H, Ar, NH<sub>2</sub>); <sup>13</sup>C NMR (75 MHz, DMSO-d<sub>6</sub>): δ 37.4, 56.0, 110.4, 116.5, 116.9, 118.6, 119.3, 124.8, 125.0, 128.7, 130.4, 133.0, 134.8, 148.3, 150.3, 154.0, 159.2; HR-MS Calcd for C<sub>20</sub>H<sub>11</sub>N<sub>3</sub>O<sub>3</sub> ([M+H]<sup>+</sup>) : 342.0879 found : 342.0890

**3-Amino-5-oxo-1-thiophen-1,5-dihydro-pyrano[2,3-c]chromene-2-carbonitrile (2i):** Characteristic:

Yellow crystalline solid; mp: 205 °C; IR (KBr): 3448, 3278, 2252, 1702, 1600, 1374, 1187, 1077, 971cm<sup>-1</sup>; <sup>1</sup>H NMR (300 MHz, DMSO-d<sub>6</sub>): δ 5.13(s, 1H, CH), 7.19-7.84 (m, 8H, Ar, NH<sub>2</sub>), 8.15 (s, 1H, Ar); <sup>13</sup>C NMR (75 MHz, DMSO-d<sub>6</sub>): δ 37.6, 56.9, 116.3, 116.5, 117.8, 118.7, 120.1, 125.0, 129.1, 132.7, 142.5, 142.8, 153.2, 159.25, 164.0; HR-MS Calcd for C<sub>17</sub>H<sub>10</sub>N<sub>2</sub>O<sub>3</sub>S ([M+H]<sup>+</sup>) : 323.0509 found : 323.0502

**Bis[pyrano[2,3-c]chromene-2-carbonitrile] (2j):** Characteristic: Yellow crystalline solid; mp: 272 °C;

IR (KBr):3341, 3206, 2193, 1720, 1659, 1606, 1459, 1406, 1168, 1119 cm<sup>-1</sup>; <sup>1</sup>H NMR (300 MHz, DMSO-d<sub>6</sub>): δ 5.14 (s, 2H, CH), 7.34-7.47 (m, 6H, Ar, NH<sub>2</sub>), 7.60-7.66 (m, 4H), 7.83-7.89 (m, 4H, Ar), 8.15-8.18(m, 2H, Ar); <sup>13</sup>C NMR (75 MHz, DMSO-d<sub>6</sub>): δ 37.4, 56.0, 110.4, 116.5, 116.9, 118.6, 119.3, 124.8, 125.0, 128.7, 130.4, 133.0, 134.8, 148.3, 150.3, 154.0, 159.2; HR-MS Calcd for C<sub>32</sub>H<sub>18</sub>N<sub>4</sub>O<sub>6</sub> ([M+H]<sup>+</sup>) : 342.0879 found : 342.0890

**2-Amino-7,7-dimethyl-5-oxo-4-phenyl-5,6,7,8-tetrahydro-4H-chromene-3-carbonitrile (3a):**

Characteristic: white crystalline solid; mp: 232 °C; IR (KBr): 3393, 3323, 2166, 1662 cm<sup>-1</sup>; <sup>1</sup>H NMR (300 MHz, CDCl<sub>3</sub>+DMSO-d<sub>6</sub>): δ 0.86-1.05 (6H, m), 2.03-2.16 (2H, m), 2.35 (2H, s), 4.24 (1H, s), 5.40 (2H, s), 7.04-7.18 (5H, m); <sup>13</sup>C NMR (75 MHz, CDCl<sub>3</sub>+DMSO-d<sub>6</sub>): δ 27.1, 28.3, 31.6, 35.2, 50.2, 113.4,

126.4, 127.0, 127.9, 161.2, 195.3; Anal. Calcd for  $C_{18}H_{18}N_2O_2$ : C 73.45, H 6.16, N 9.52 %. Found: C 73.47, H 6.13, N 9.54 %; HRMS of  $[C_{18}H_{18}N_2O_2 + H^+]$ : Calcd: 295.1447 found: 295.1449

**2-Amino-7,7-dimethyl-4-(4-nitro-phenyl)-5-oxo-5,6,7,8-tetrahydro-4H-chromene-3-carbonitrile**

**(3b)**: Characteristic: yellow crystalline solid; mp: 176 °C; IR (KBr): 3389, 3319, 2191, 1682  $cm^{-1}$ ;  $^1H$  NMR (300 MHz,  $CDCl_3+DMSO-d_6$ ):  $\delta$  0.84-1.05 (6H, m), 1.89-2.16 (4H, m), 4.33 (1H, s), 6.18(2H, s), 7.29 (2H, d,  $J=4.2$  Hz), 8.02 (2H, d,  $J=4.2$  Hz);  $^{13}C$  NMR (75 MHz,  $CDCl_3+DMSO-d_6$ ):  $\delta$  13.7, 20.5, 27.1, 28.4, 31.7, 35.5, 50.0, 58.3, 59.7, 112.2, 118.7, 123.2, 128.2, 146.3, 151.1, 158.3, 162.3, 195.4; Anal. Calcd for  $C_{18}H_{17}N_3O_4$ : C 63.71, H 5.05, N 12.38 %. Found: C 63.73, H 5.08, N 12.34 %; HRMS of  $[C_{18}H_{17}N_3O_4 + H^+]$ : Calcd: 340.1298 found: 340.1301

**2-Amino-7,7-dimethyl-4-(4-methoxy-phenyl)-5-oxo-5,6,7,8-tetrahydro-4H-chromene-3-carbonitrile**

**(3c)**: Characteristic: white crystalline solid; mp: 200 °C; IR (KBr): 3371, 3192, 2191, 1654  $cm^{-1}$ ;  $^1H$  NMR (300 MHz,  $CDCl_3+DMSO-d_6$ ):  $\delta$  0.73 (3H, s), 0.81 (3H, s), 1.84-1.97 (2H, m), 2.17 (2H, s), 3.46 (3H, s), 5.55 (2H, s), 6.50 (2H, d,  $J=8.7$  Hz), 6.85 (2H, d,  $J=8.7$  Hz);  $^{13}C$  NMR (75 MHz,  $CDCl_3+DMSO-d_6$ ):  $\delta$  26.8, 28.1, 31.3, 34.2, 49.9, 54.4, 60.2, 113.1, 118.9, 127.8, 135.6, 157.6, 160.9, 195.2; Anal. Calcd for  $C_{19}H_{20}N_2O_3$ : C 70.35, H 6.21, N 8.64 %. Found: C 70.37, H 6.19, N 8.66 %; HRMS of  $[C_{19}H_{20}N_2O_3 + H^+]$ : Calcd: 325.1553 found: 325.1557

**2-Amino-7,7-dimethyl-4-(4-methyl-phenyl)-5-oxo-5,6,7,8-tetrahydro-4H-chromene-3-carbonitrile**

**(3d)**: Characteristic: white crystalline solid; mp: 212 °C; IR (KBr): 3390, 3320, 2192, 1653  $cm^{-1}$ ;  $^1H$  NMR (300 MHz,  $CDCl_3+DMSO-d_6$ ):  $\delta$  0.89 (3H, s), 0.97 (3H, s), 1.89-2.12 (4H, m), 2.33 (3H, s), 4.13 (1H, s), 5.81 (2H, s), 6.91-6.97 (4H, m);  $^{13}C$  NMR (75 MHz,  $CDCl_3+DMSO-d_6$ ):  $\delta$  14.2, 21.0, 27.6, 28.9, 32.1, 35.4, 50.7, 60.2, 113.9, 119.7, 127.4, 129.1, 136.2, 141.2, 158.5, 161.9, 195.9; Anal. Calcd for  $C_{19}H_{20}N_2O_2$ : C 74.00, H 6.54, N 9.08 %. Found: C 74.01, H 6.57, N 9.06 %; HRMS of  $[C_{19}H_{20}N_2O_2 + H^+]$ : Calcd: 309.1604 found: 309.1607

**2-Amino-4-(4-dimethylamino-phenyl)-7,7-dimethyl-5-oxo-5,6,7,8-tetrahydro-4H-chromene-**

**3-carbonitrile (3e):** Characteristic: orange crystalline solid; mp: 214 °C; IR (KBr): 3398, 3326, 2187, 1662 cm<sup>-1</sup>; <sup>1</sup>H NMR (300 MHz, CDCl<sub>3</sub>+DMSO-d<sub>6</sub>): δ 0.99 (3H, s), 1.07 (3H, s), 2.07-2.23 (2H, m), 2.44 (2H, s), 2.88 (6H, s), 4.15 (1H, s), 6.22 (2H, s), 6.61 (2H, d, *J*=8.4 Hz), 7.01 (2H, d, *J*=8.4 Hz); <sup>13</sup>C NMR (75 MHz, CDCl<sub>3</sub>+DMSO-d<sub>6</sub>): δ 26.1, 30.7, 49.3, 59.0, 111.3, 112.6, 118.7, 126.8, 157.1, 160.3, 194.5; Anal. Calcd for C<sub>20</sub>H<sub>23</sub>N<sub>3</sub>O<sub>2</sub>: C 71.19, H 6.87, N 12.45 %. Found: C 71.21, H 6.90, N 12.43 %; HRMS of [C<sub>20</sub>H<sub>23</sub>N<sub>3</sub>O<sub>2</sub> + H<sup>+</sup>]: Calcd: 338.1869 found: 338.1872

**2-Amino-4-furan-2-yl-7,7-dimethyl-5-oxo-5,6,7,8-tetrahydro-4H-chromene-3-carbonitrile**

**(3f):** Characteristic: white crystalline solid; mp: 224 °C; IR (KBr): 3395, 3327, 2195, 1665 cm<sup>-1</sup>; <sup>1</sup>H NMR (300 MHz, CDCl<sub>3</sub>): δ 1.06 (3H, s), 1.12 (3H, s), 2.28 (2H, s), 2.44 (2H, s), 4.57 (1H, s), 4.62 (2H, s), 6.18 (1H, d, *J*=3.0 Hz), 6.27 (1H, dd, *J*=3.0 & 1.8 Hz), 7.26 (1H, d, *J*=1.8 Hz); <sup>13</sup>C NMR (75 MHz, CDCl<sub>3</sub>): δ 27.4, 28.9, 29.0, 32.2, 40.7, 50.6, 106.2, 110.5, 141.7, 154.2, 158.3, 162.4, 195.6; Anal. Calcd for C<sub>16</sub>H<sub>16</sub>N<sub>2</sub>O<sub>3</sub>: C 67.59, H 5.67, N 9.85 %. Found: C 67.61, H 5.64, N 9.84 %; HRMS of [C<sub>16</sub>H<sub>16</sub>N<sub>2</sub>O<sub>3</sub> + H<sup>+</sup>]: Calcd: 285.1240 found: 285.1237

**2-Amino-7,7-dimethyl-5-oxo-4-pyridin-4-yl-5,6,7,8-tetrahydro-4H-chromene-3-carbonitrile**

**(3g):** Characteristic: white crystalline solid; mp: 192 °C; IR (KBr): 3392, 3042, 2184, 1673 cm<sup>-1</sup>; <sup>1</sup>H NMR (300 MHz, CDCl<sub>3</sub>+DMSO-d<sub>6</sub>): δ 0.91 (3H, s), 0.99 (3H, s), 2.03-2.17 (2H, m), 2.37 (2H, s), 4.21 (1H, s), 6.16 (2H, s), 7.06-7.08 (2H, m), 8.36, 8.38 (2H, m); <sup>13</sup>C NMR (75 MHz, CDCl<sub>3</sub>+DMSO-d<sub>6</sub>): δ 27.5, 28.8, 32.1, 35.5, 50.5, 58.5, 112.5, 119.3, 122.9, 149.7, 152.8, 158.9, 162.9, 195.8; Anal. Calcd for C<sub>17</sub>H<sub>17</sub>N<sub>3</sub>O<sub>2</sub>: C 69.14, H 5.80, N 14.23 %. Found: C 69.16, H 5.82, N 14.26 %. HRMS of [C<sub>17</sub>H<sub>17</sub>N<sub>3</sub>O<sub>2</sub> + H<sup>+</sup>]: Calcd: 296.1400 found: 296.1398

**3-amino-1-phenyl-1H-benzo[f]chromene-2-carbonitrile (4a):**

White solid: mp 209 °C; <sup>1</sup>H NMR (300 MHz, DMSO-d<sub>6</sub>) δ 5.09 (1H, s), 6.30 (2H, br s), 7.02-7.29 (7H, m), 7.61-7.78 (3H, m); <sup>13</sup>C NMR (75 MHz, DMSO-d<sub>6</sub>) δ 58.7, 115.0, 116.5, 120.2, 123.1, 124.4, 126.3, 126.6, 128.3, 129.0, 130.7, 144.9, 146.8, 159.4; Anal. Calcd for C<sub>20</sub>H<sub>14</sub>N<sub>2</sub>O: C, 80.52; H, 4.73; N, 9.39 % Found: C, 80.58; H, 4.75; N, 9.32 %

**3-amino-1-(4-methoxyphenyl)-1H-benzo[f]chromene-2-carbonitrile (4b):**

White solid: mp 224 °C; <sup>1</sup>H NMR (300 MHz, DMSO-d<sub>6</sub>) δ 3.61 (3H, s), 5.10 (1H, s), 6.30 (2H, s), 6.72 (2H, d, J=8.4 Hz), 7.09 (2H, d, J=8.4 Hz) 7.31-7.41 (3H, m), 7.55-7.60 (2H, m), 7.78 (1H, d, J=7.8 Hz); <sup>13</sup>C NMR (75 MHz, DMSO-d<sub>6</sub>) δ 55.0, 58.1, 102.0, 111.1, 113.1, 113.4, 116.9, 117.8, 122.8, 124.0, 128.7, 131.9, 138.2, 141.9, 149.4, 152.1, 157.7, 160.4. Anal. Calcd for C<sub>21</sub>H<sub>16</sub>N<sub>2</sub>O<sub>2</sub>: C, 76.81; H, 4.91; N, 8.53 %. Found: C, 76.85; H, 4.93; N, 8.57 %

**3-amino-1-(4-nitrophenyl)-1H-benzo[f]chromene-2-carbonitrile (4c):**

White solid: mp 229 °C; <sup>1</sup>H NMR (300 MHz, DMSO-d<sub>6</sub>) δ 5.25 (1H, s), 6.22(2H, s), 7.16-7.88 (10H, m); <sup>13</sup>C NMR (75 MHz, DMSO-d<sub>6</sub>) δ 58.3, 113.9, 117.0, 120.2, 121.8, 121.9, 123.2, 125.2, 127.5, 128.7, 130.0, 130.3, 131.3, 133.5, 147.3, 148.5, 160.0; Anal. Calcd for C<sub>20</sub>H<sub>13</sub>N<sub>3</sub>O<sub>3</sub>: C, 69.96; H, 3.82; N, 12.24 %. Found: C, 69.90; H, 3.81; N, 12.29 %

**2-Amino-5-oxo-4-phenyl-4,5-dihydropyrano[3,2-c]-chromene-3-carbonitrile (5a):** White solid: mp 264–265 °C; <sup>1</sup>H NMR (300 MHz, DMSO-d<sub>6</sub>) δ 7.90–7.93 (d, J = 7.8 Hz, 1 H), 7.69–7.72 (t, J = 6.9 Hz, 1 H), 7.42–7.52 (m, 3 H), 7.25–7.33 (m, 5 H), 4.46 (s, 1 H); <sup>13</sup>C NMR (75 MHz, DMSO-d<sub>6</sub>) δ 159.5, 157.9, 153.4, 152.1, 143.3, 132.9, 128.5, 127.6, 127.1, 124.6, 122.4, 119.2, 116.5, 112.9, 104.0, 57.9, 36.9; IR (neat) 3350, 3320, 2921, 2852, 2195, 1700, 1669, 1603, 1373, 1044, 759 cm<sup>-1</sup>; HRMS (ESI) C<sub>19</sub>H<sub>12</sub>N<sub>2</sub>O<sub>3</sub> [M + H]<sup>+</sup> calcd 317.0921, found 317.0926

**2-Amino-4-(4-chlorophenyl)-5-oxo-4,5-dihydropyrano-[3,2-c]chromene-3-carbonitrile (5b):** White solid: mp 233–234 °C; <sup>1</sup>H NMR (300 MHz, DMSO-d<sub>6</sub>) δ 7.90–7.93 (d, J = 7.5 Hz, 1 H), 7.70–7.75 (t, J = 7.5 Hz, 1 H), 7.45–7.53 (m, 3 H), 7.30–7.39 (dd, J = 8.4 Hz, 19.5 Hz, 4 H), 4.50 (s, 1 H); <sup>13</sup>C NMR (75 MHz, DMSO-d<sub>6</sub>) δ 160.0, 158.4, 154.0, 152.6, 142.8, 133.5, 132.2, 130.1, 128.9, 125.1, 123.0, 119.5, 117.0, 113.4, 103.9, 58.0, 36.8; IR (neat) 3404, 2924, 2255, 2184, 2128, 1704, 1668, 1378, 1026, 1001, 763 cm<sup>-1</sup>; HRMS (ESI) C<sub>19</sub>H<sub>11</sub>ClN<sub>2</sub>O<sub>3</sub> [M + NH<sub>4</sub>]<sup>+</sup> calcd 368.0796, found 368.0804.

**2-Amino-4-(4-methoxyphenyl)-5-oxo-4,5-dihydropyrano[3,2-c]chromene-3-carbonitrile (5c):** White solid: mp 233–234 °C; <sup>1</sup>H NMR (300 MHz, DMSO-d<sub>6</sub>) δ 7.90–7.93 (d, J = 7.8 Hz, 1 H), 7.69–7.74 (t, J = 7.5 Hz, 1 H), 7.44–7.52 (m, 3 H), 7.23–7.28 (t, J = 8.4 Hz, 1 H), 6.85 (s, 1 H), 6.82 (s, 2 H), 4.45 (s, 1H), 3.74 (s, 3 H); <sup>13</sup>C NMR (75 MHz, DMSO-d<sub>6</sub>) δ 159.5, 159.2, 157.9, 153.4, 152.1, 144.8, 132.9, 129.6, 124.6, 122.4, 119.7, 119.1, 116.5, 113.8, 112.9, 111.9, 103.8, 57.8, 54.9, 36.8; IR (neat) 3364, 3313, 3177, 2920, 2850, 2189, 1710, 1668, 1371, 1051, 766 cm<sup>-1</sup>; HRMS (ESI) C<sub>20</sub>H<sub>14</sub>N<sub>2</sub>O<sub>4</sub> [M + H]<sup>+</sup> calcd 347.1026, found 347.1031.

**2-Amino-4-(4-fluorophenyl)-5-oxo-4,5-dihydropyrano-[3,2-c]chromene-3-carbonitrile (5d):** White solid: mp 243–244 °C; <sup>1</sup>H NMR (300 MHz, DMSO-d<sub>6</sub>) δ 7.90–7.93 (d, J = 7.8 Hz, 1 H), 7.69–7.74 (t, J = 7.2 Hz, 1 H), 7.44–7.52 (m, 3 H), 7.32–7.36 (dd, J = 5.4 Hz, 8.4 Hz, 2 H), 7.12–7.18 (t, J = 9.0 Hz, 2 H), 4.50 (s, 1H); <sup>13</sup>C NMR (75 MHz, DMSO-d<sub>6</sub>) δ 162.8, 159.5 (d, J = 6.8 Hz), 157.8, 153.3, 152.1, 139.4, 132.9, 129.6 (d, J = 8.3 Hz), 124.6, 122.4, 119.1, 116.5, 115.1 (d, J = 21.8 Hz), 112.9, 103.7, 57.7, 36.2; IR (neat) 3378, 2922, 2852, 2254, 2191, 1714, 1673, 1376, 1025, 1000, 761 cm<sup>-1</sup>; HRMS (ESI) C<sub>19</sub>H<sub>11</sub>FN<sub>2</sub>O<sub>3</sub> [M + H]<sup>+</sup> calcd 335.0826, found 335.0834.

**2-Amino-4-(2-chlorophenyl)-5-oxo-4,5-dihydropyrano-[3,2-c]chromene-3-carbonitrile (5e):** White solid: mp 227–228 °C; <sup>1</sup>H NMR (300 MHz, DMSO-d<sub>6</sub>) δ 7.91–7.93 (d, J = 7.8 Hz, 1 H), 7.70–7.75 (t, J = 7.5 Hz, 1 H), 7.45–7.52 (m, 3 H), 7.26–7.37 (m, 4 H), 4.53 (s, 1 H); <sup>13</sup>C NMR (75 MHz, DMSO-d<sub>6</sub>) δ 160.0, 158.4, 154.2, 152.6, 146.2, 133.5, 133.4, 130.8, 128.0, 127.6, 127.0, 125.1, 123.0, 119.5, 117.0,



113.4, 103.6, 57.8, 37.1; IR (neat) 3350, 3185, 2923, 2854, 2196, 1725, 1672, 1603, 1371, 1025, 756  $\text{cm}^{-1}$ ; HRMS (ESI)  $\text{C}_{19}\text{H}_{11}\text{ClN}_2\text{O}_3$   $[\text{M} + \text{NH}_4]^+$  calcd 368.0796, found 368.0802.

**2-Amino-5-oxo-4-phenyl-5,6,7,8-tetrahydro-4H-chromene-3-carbonitrile (6a):** White solid: mp 211–212 °C;  $^1\text{H}$  NMR (300 MHz,  $\text{DMSO-d}_6$ )  $\delta$  7.25–7.30 (t,  $J = 7.5$  Hz, 2 H), 7.14–7.17 (m, 3 H), 6.99 (s, 2 H), 4.19 (s, 1 H), 2.58–2.61 (m, 2 H), 2.20–2.31 (m, 2 H), 1.84–1.99 (m, 2 H);  $^{13}\text{C}$  NMR (75 MHz,  $\text{DMSO-d}_6$ )  $\delta$  196.3, 164.9, 158.9, 145.2, 128.8, 127.6, 127.0, 120.2, 114.2, 58.7, 36.8, 35.9, 26.9, 20.3; IR (neat) 3326, 3208, 2923, 2855, 2187, 1678, 1645, 1601, 1361, 994, 692  $\text{cm}^{-1}$ ; HRMS (ESI)  $\text{C}_{16}\text{H}_{14}\text{N}_2\text{O}_2$   $[\text{M} + \text{H}]^+$  calcd 267.1128, found 267.1131.

**2-Amino-4-(4-methoxyphenyl)-5-oxo-5,6,7,8-tetrahydro-4H-chromene-3-carbonitrile (6b):** White solid: mp 206–207 °C;  $^1\text{H}$  NMR (300 MHz,  $\text{DMSO-d}_6$ )  $\delta$  7.05–7.08 (dd,  $J = 1.8$  Hz, 6.6 Hz, 2H), 6.95 (s, 1 H), 6.82–6.85 (dd,  $J = 2.1$  Hz, 6.9 Hz, 2 H), 4.13 (s, 1H), 3.71 (s, 3 H), 2.60–2.62 (m, 2 H), 2.24–2.30 (m, 2 H), 1.86–1.99 (m, 2 H);  $^{13}\text{C}$  NMR (75 MHz,  $\text{DMSO-d}_6$ )  $\delta$  196.3, 164.6, 158.8, 158.4, 137.4, 128.6, 120.3, 114.5, 114.1, 58.9, 55.5, 36.8, 35.0, 26.9, 20.3; IR (neat) 3330, 3212, 3187, 2928, 2193, 1682, 1654, 1367, 1260, 1170, 535  $\text{cm}^{-1}$ ; HRMS (ESI)  $\text{C}_{17}\text{H}_{16}\text{N}_2\text{O}_3$   $[\text{M} + \text{H}]^+$  calcd 297.1234, found 297.1232.

**2-Amino-4-(4-fluorophenyl)-5-oxo-5,6,7,8-tetrahydro-4H-chromene-3-carbonitrile (6c):** White solid: mp 209–210 °C;  $^1\text{H}$  NMR (300 MHz,  $\text{DMSO-d}_6$ )  $\delta$  7.18–7.22 (m, 2 H), 7.07–7.13 (m, 2H), 7.04 (s, 2 H), 4.21 (s, 1 H), 2.61–2.63 (m, 2 H), 2.27–2.28 (m, 2 H), 1.90–1.99 (m, 2 H);  $^{13}\text{C}$  NMR (75 MHz,  $\text{DMSO-d}_6$ )  $\delta$  196.4, 165.0, 163.0, 159.7, 158.9, 141.4, 129.5 (d,  $J = 8.3$  Hz), 120.1, 115.4 (d,  $J = 21.0$  Hz), 114.1, 58.5, 36.7, 35.2, 26.9, 20.2; IR (neat) 3414, 3335, 3218, 2928, 2193, 1683, 1654, 1367, 1209, 1002, 533  $\text{cm}^{-1}$ ; HRMS (ESI)  $\text{C}_{16}\text{H}_{13}\text{FN}_2\text{O}_2$   $[\text{M} + \text{H}]^+$  calcd 285.1034, found 285.1043.

**2-Amino-4-(4-chlorophenyl)-5-oxo-5,6,7,8-tetrahydro-4H-chromene-3-carbonitrile (6d):** White solid: mp 239–240 °C;  $^1\text{H}$  NMR (300 MHz,  $\text{DMSO-d}_6$ )  $\delta$  7.26–7.54 (dd,  $J = 1.8$  Hz, 6.6 Hz, 2 H), 7.17–7.20 (dd,  $J = 1.8$  Hz, 6.6 Hz, 2 H), 7.05 (s, 1 H), 4.20 (s, 1 H), 2.59–2.63 (m, 2 H), 2.21–2.31 (m, 2 H), 1.85–1.99 (m, 2 H);  $^{13}\text{C}$  NMR (75 MHz,  $\text{DMSO-d}_6$ )  $\delta$  196.3, 165.1, 158.9, 144.2, 131.5, 129.5, 128.7,

120.0, 113.8, 58.1, 36.7, 35.4, 26.9, 20.2; IR (neat) 3413, 3334, 3215, 2918, 2194, 1682, 1653, 1365, 1131, 1005, 507  $\text{cm}^{-1}$ ; HRMS (ESI)  $\text{C}_{16}\text{H}_{13}\text{ClN}_2\text{O}_2$   $[\text{M} + \text{H}]^+$  calcd 301.0738, found 301.0743.

### $^1\text{H}$ NMR, $^{13}\text{C}$ NMR Spectra of the Compounds

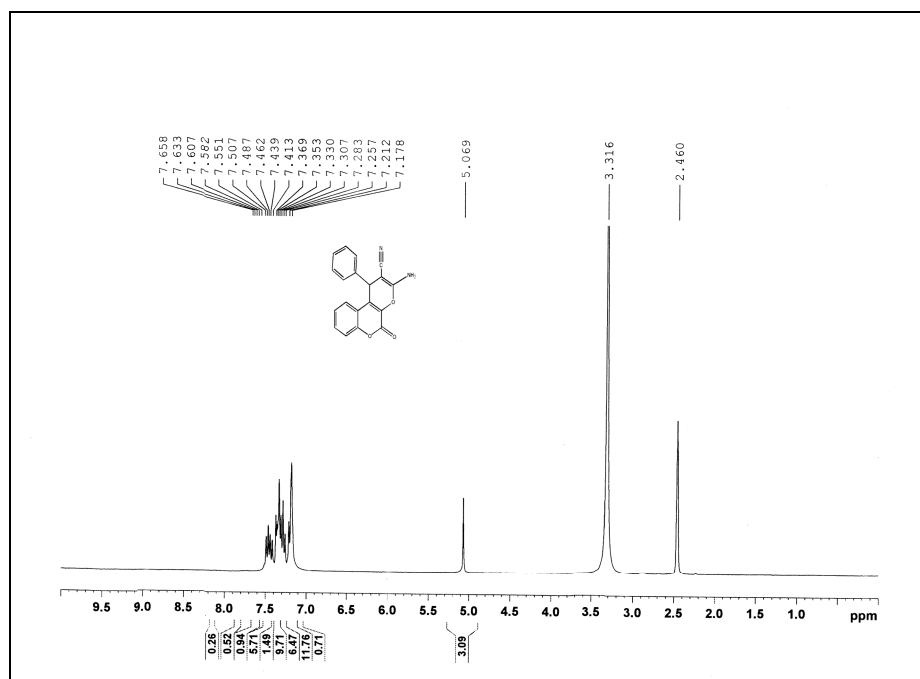

$^1\text{H}$  NMR spectrum of the product **2a**

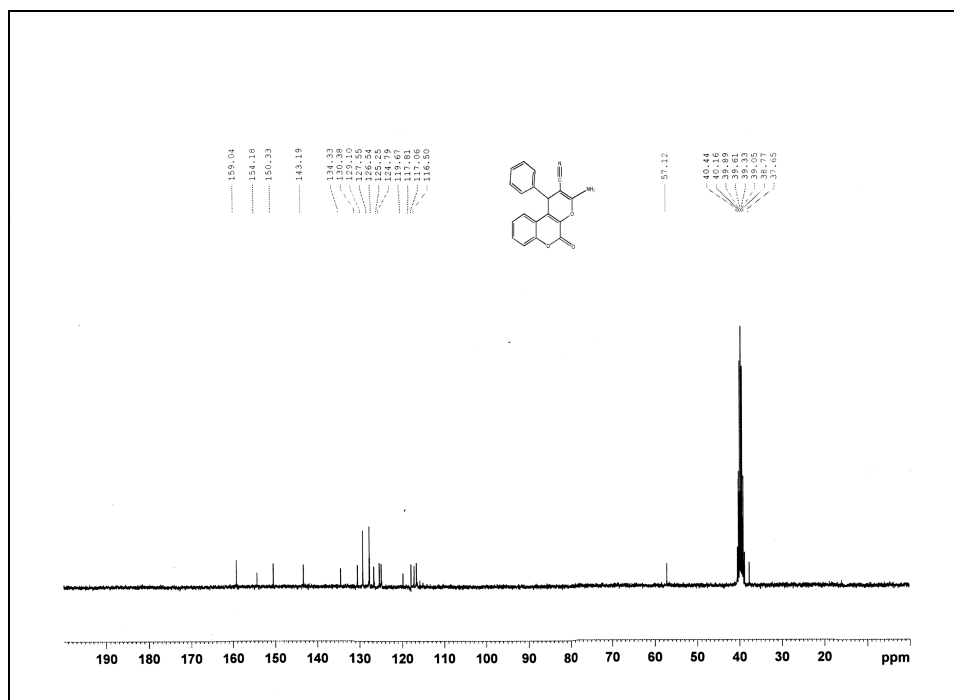

<sup>13</sup>C NMR spectrum of the product **2a**

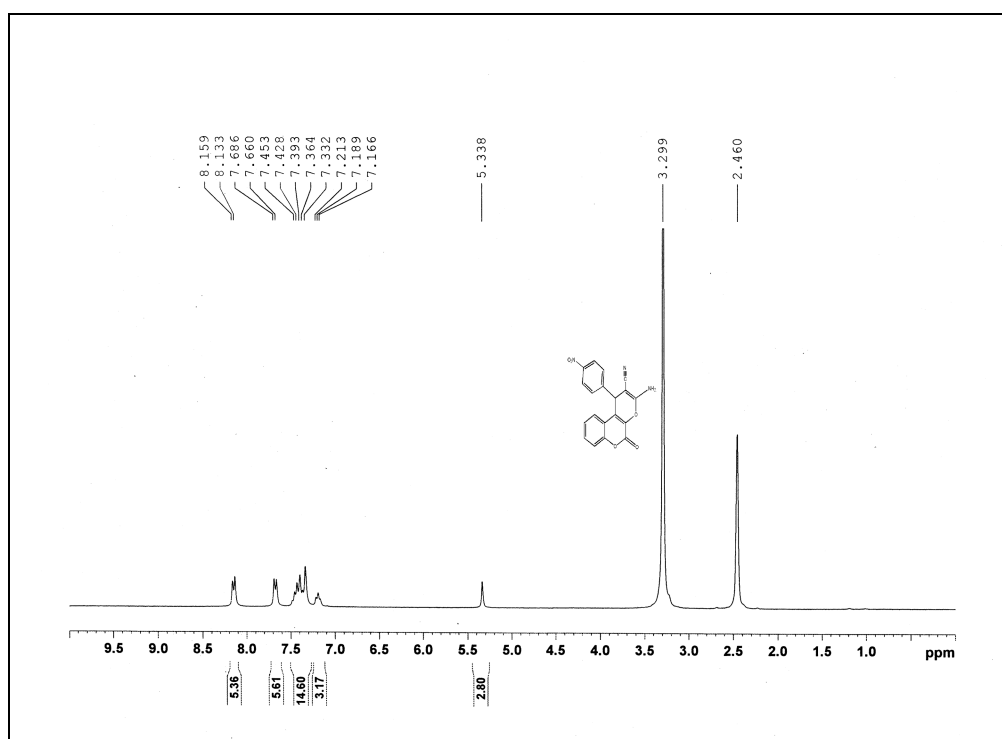

<sup>1</sup>H NMR spectrum of the product **2b**

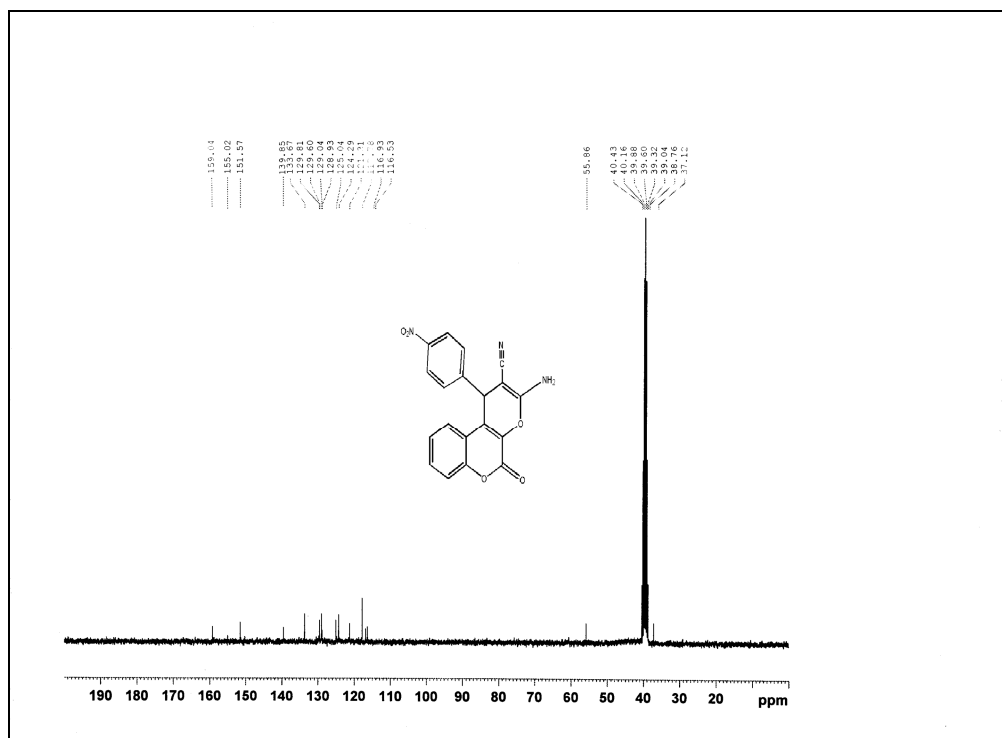

<sup>13</sup>C NMR spectrum of the product **2b**

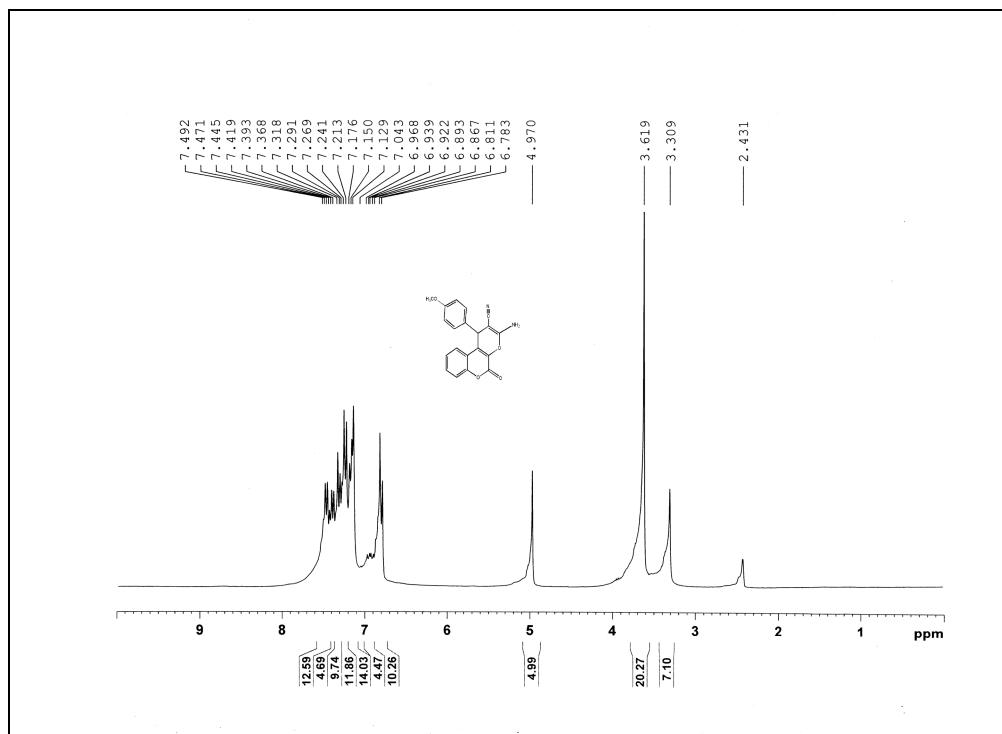

<sup>1</sup>H NMR spectrum of the product **2c**

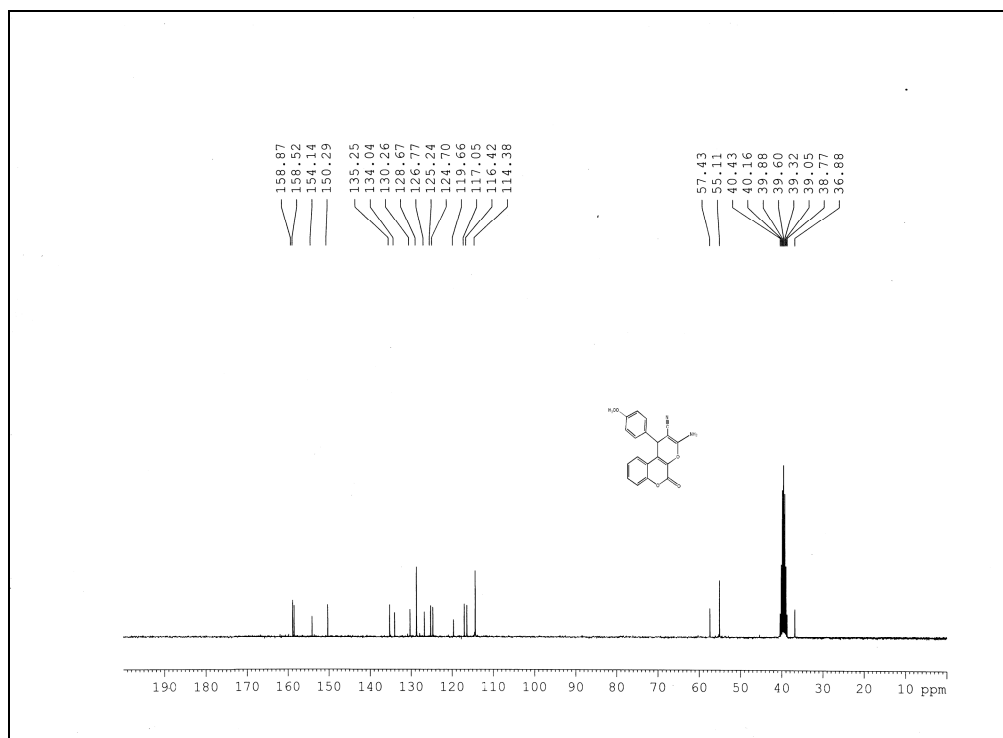

<sup>13</sup>C NMR spectrum of the product 2c

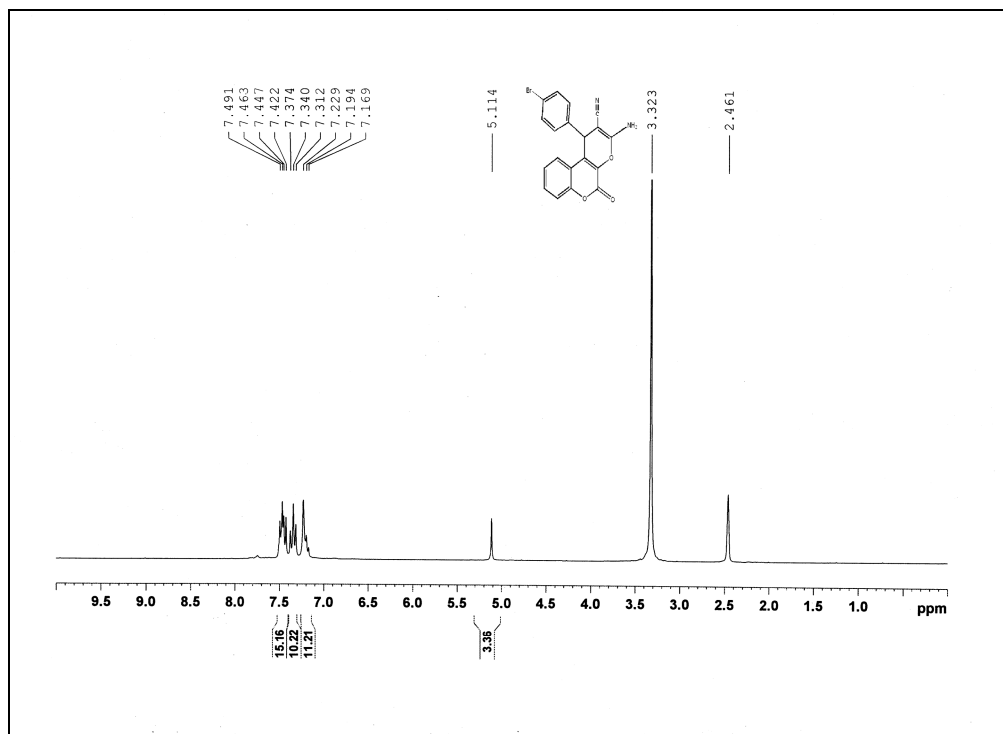

<sup>1</sup>H NMR spectrum of the product 2d

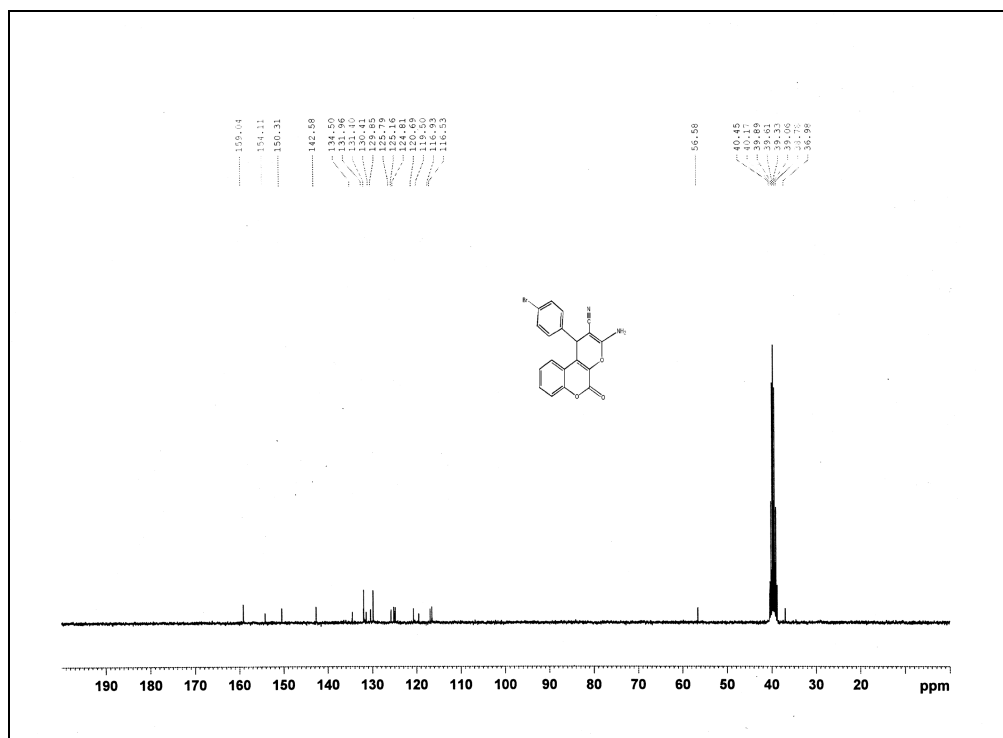

<sup>13</sup>C NMR spectrum of the product **2d**

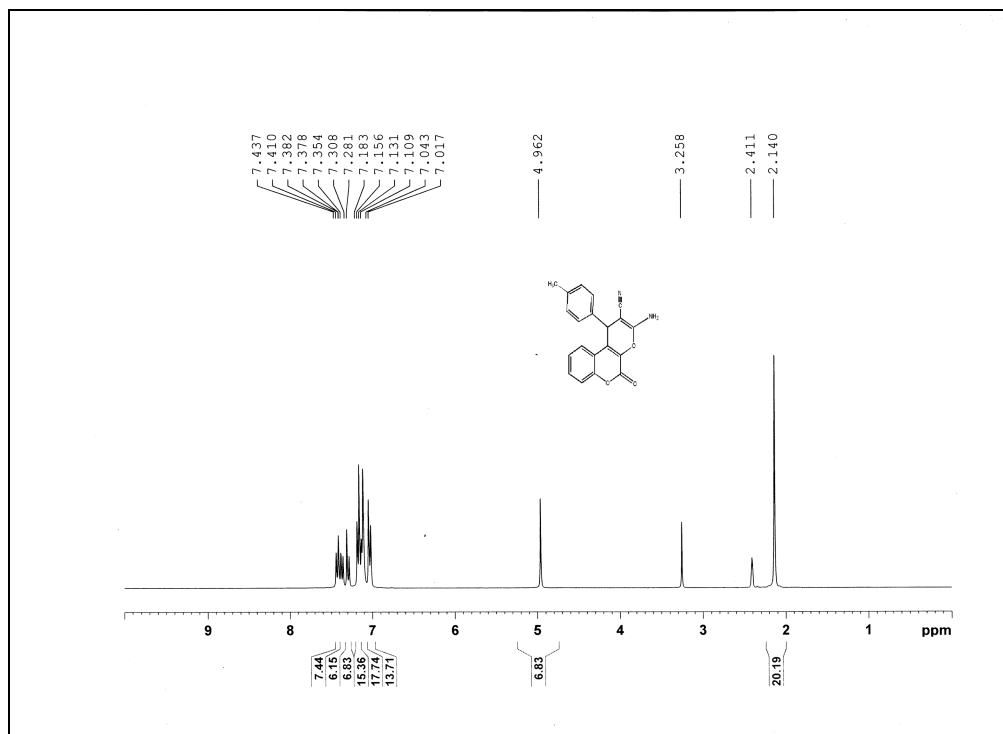

<sup>1</sup>H NMR spectrum of the product **2e**

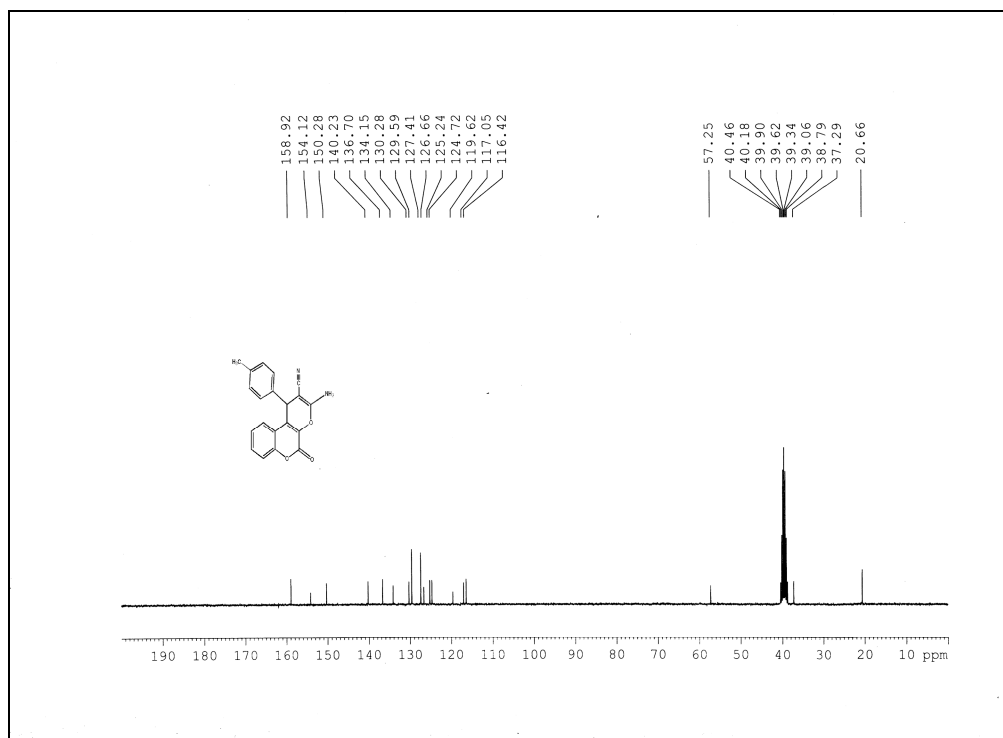

<sup>13</sup>C NMR spectrum of the product **2e**

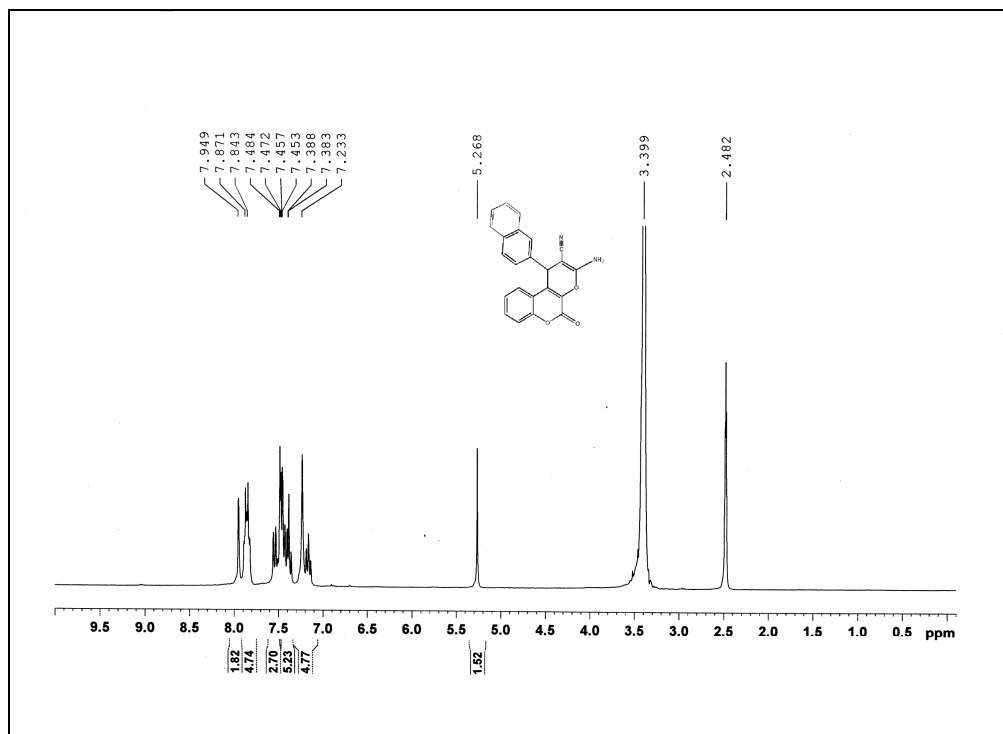

<sup>1</sup>H NMR spectrum of the product **2f**

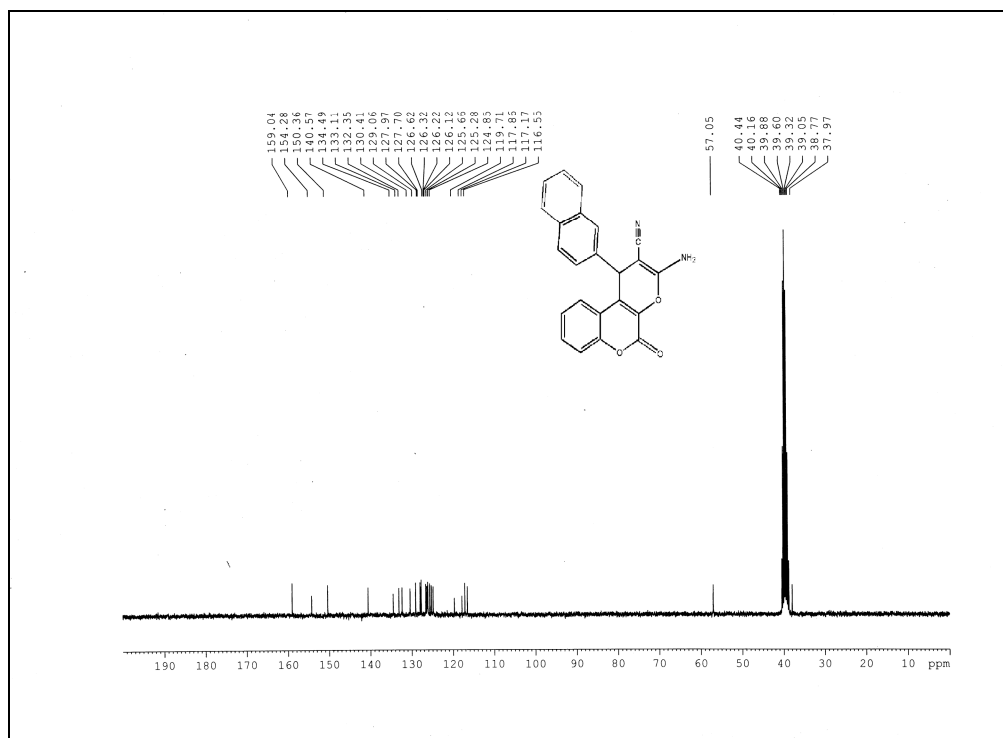

<sup>13</sup>C NMR spectrum of the product **2f**

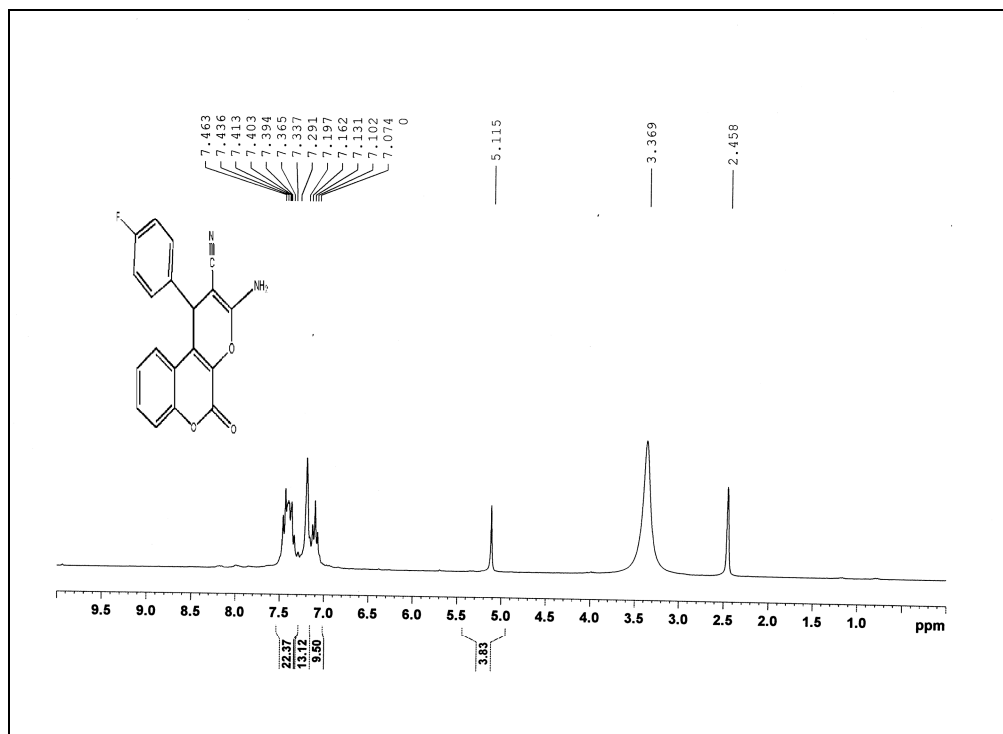

<sup>1</sup>H NMR spectrum of the product **2g**



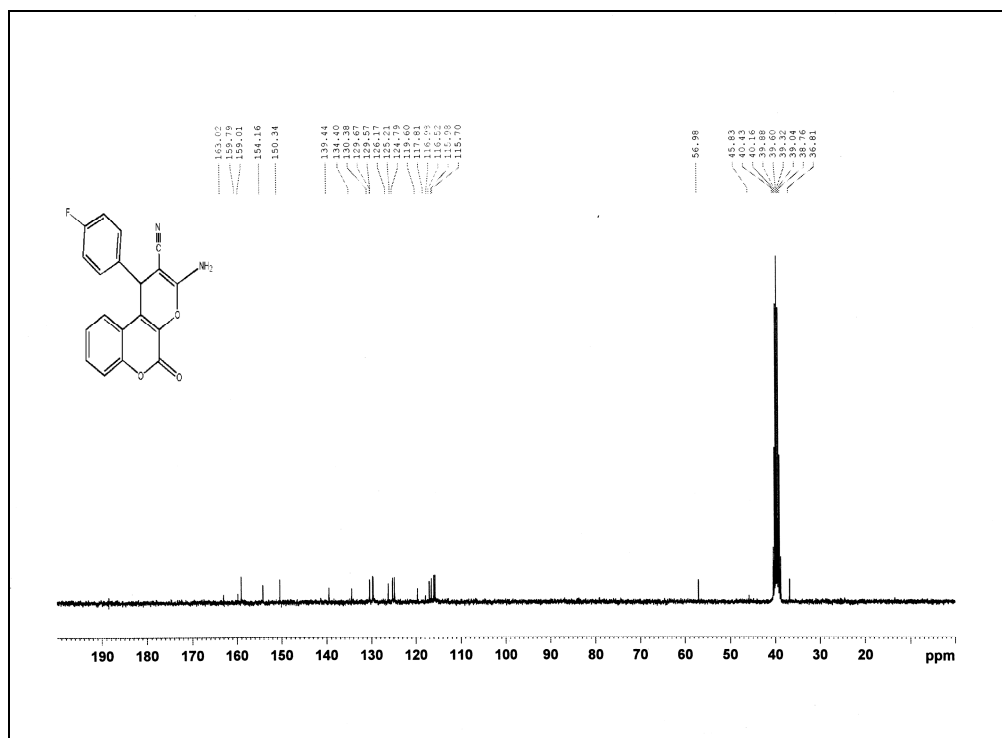

<sup>13</sup>C NMR spectrum of the product **2g**

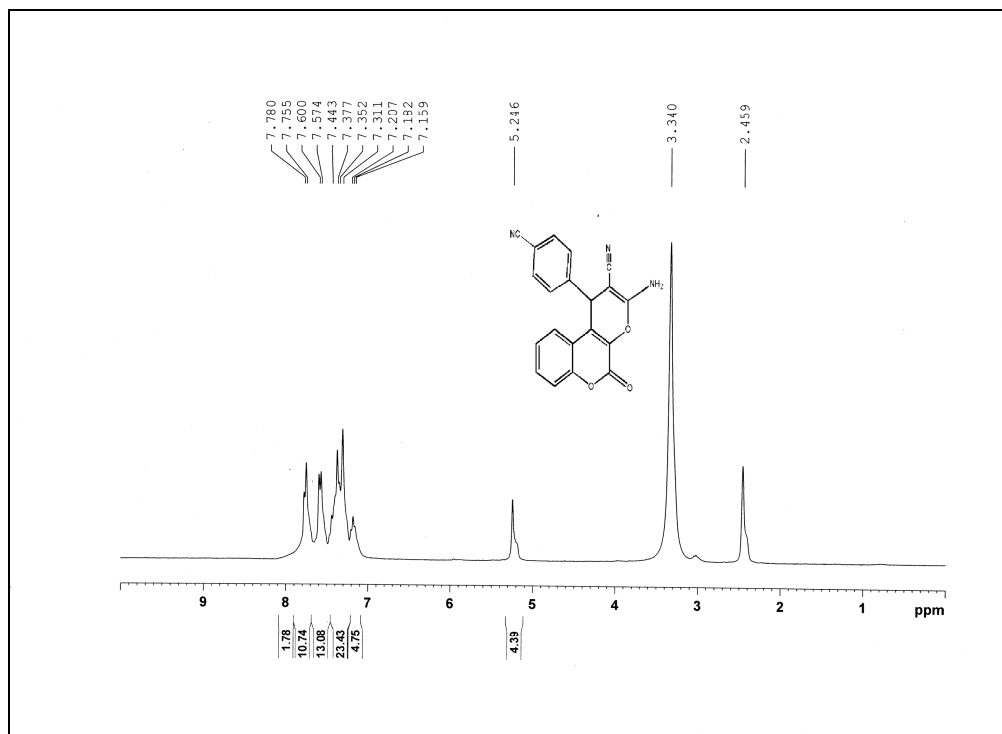

<sup>1</sup>H NMR spectrum of the product **2h**

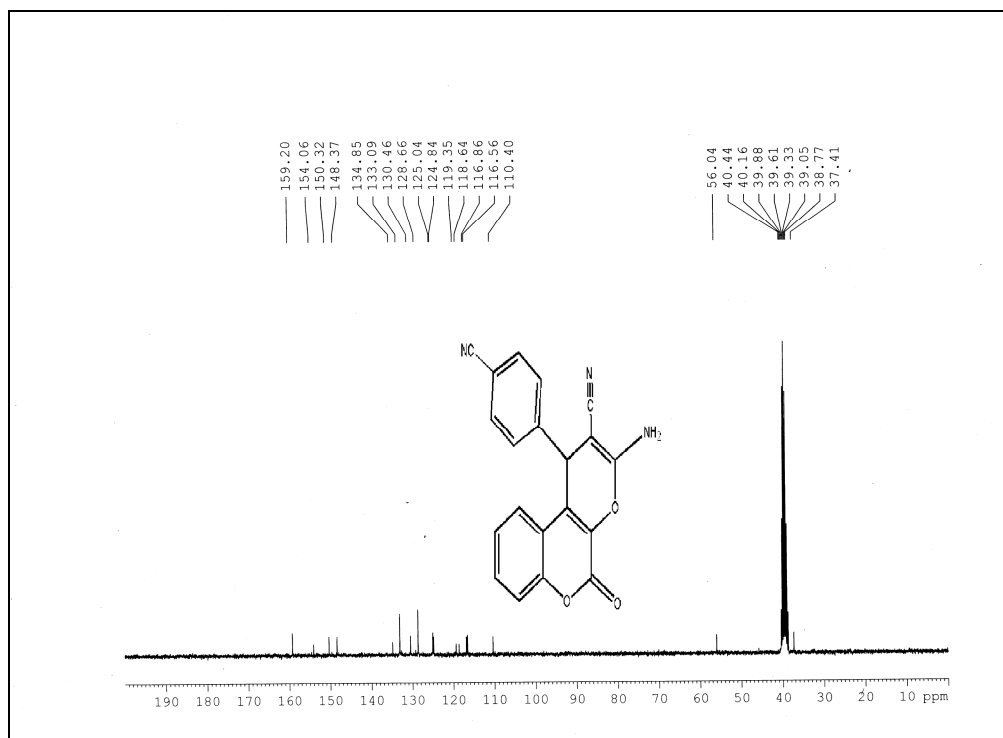

<sup>13</sup>C NMR spectrum of the product **2h**

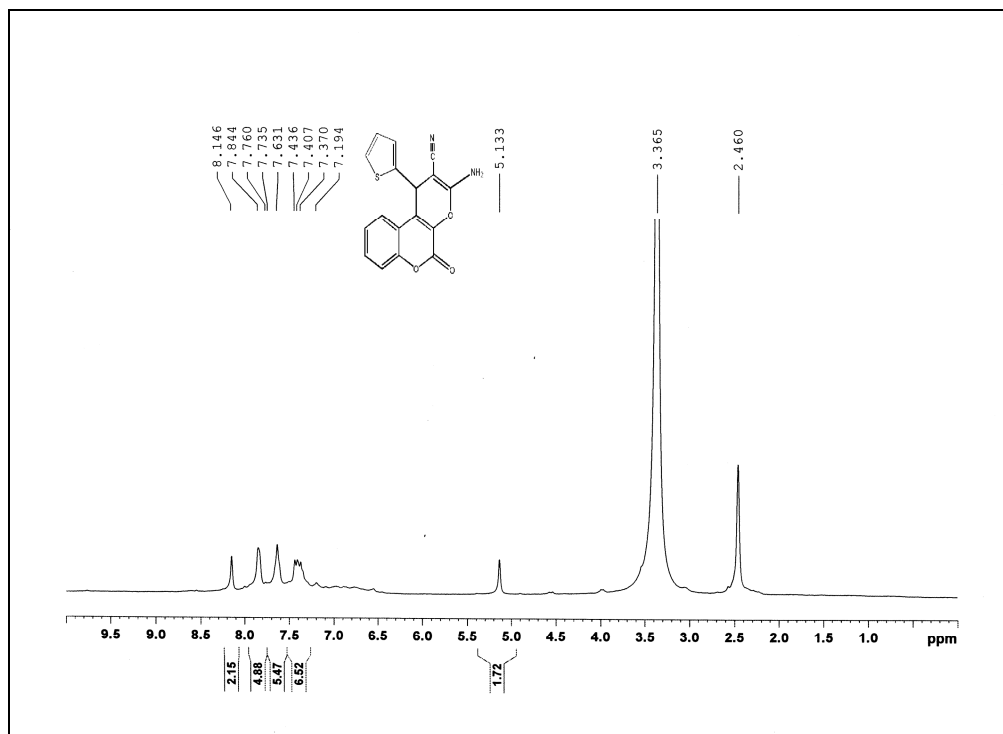

<sup>1</sup>H NMR spectrum of the product **2i**

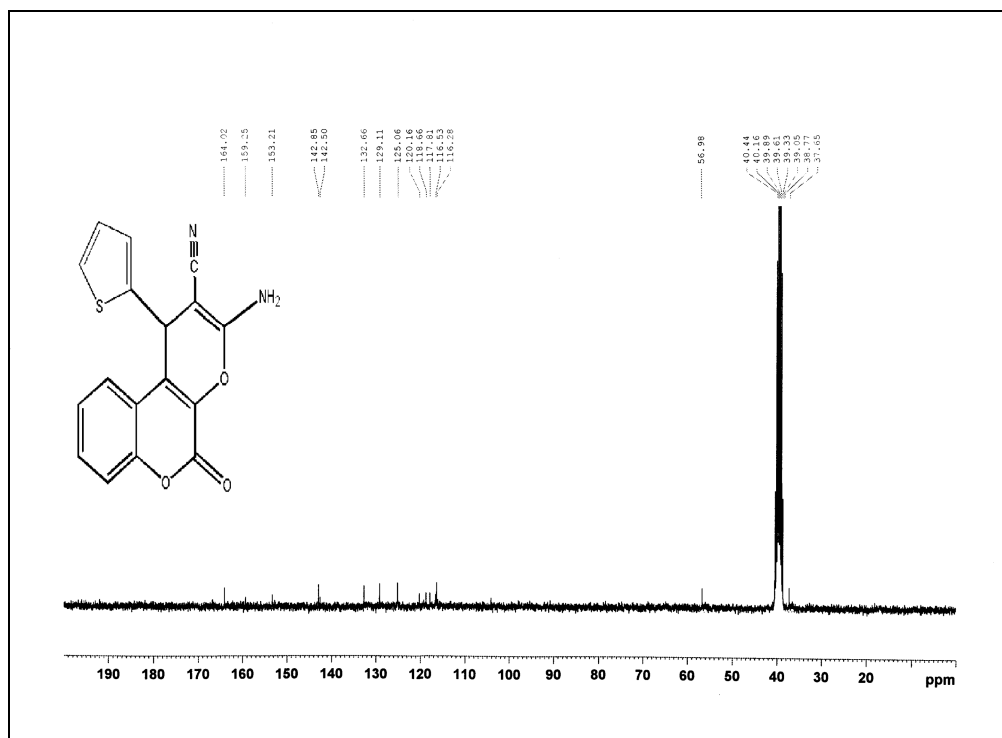

<sup>13</sup>C NMR spectrum of the product **2i**

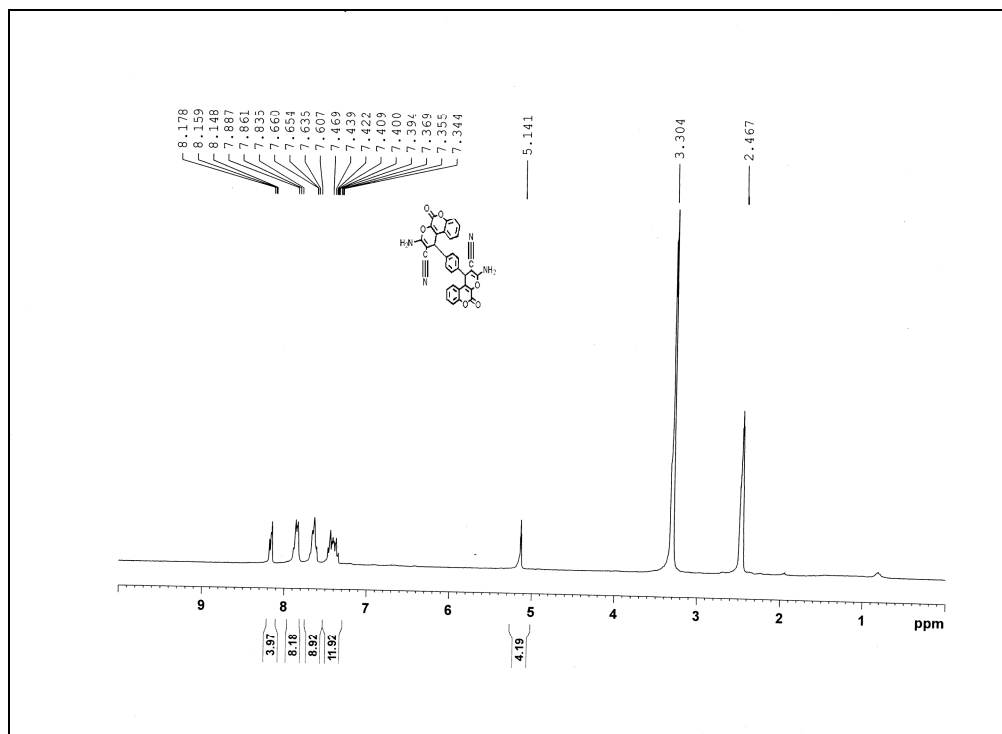

<sup>1</sup>H NMR spectrum of the product **2j**

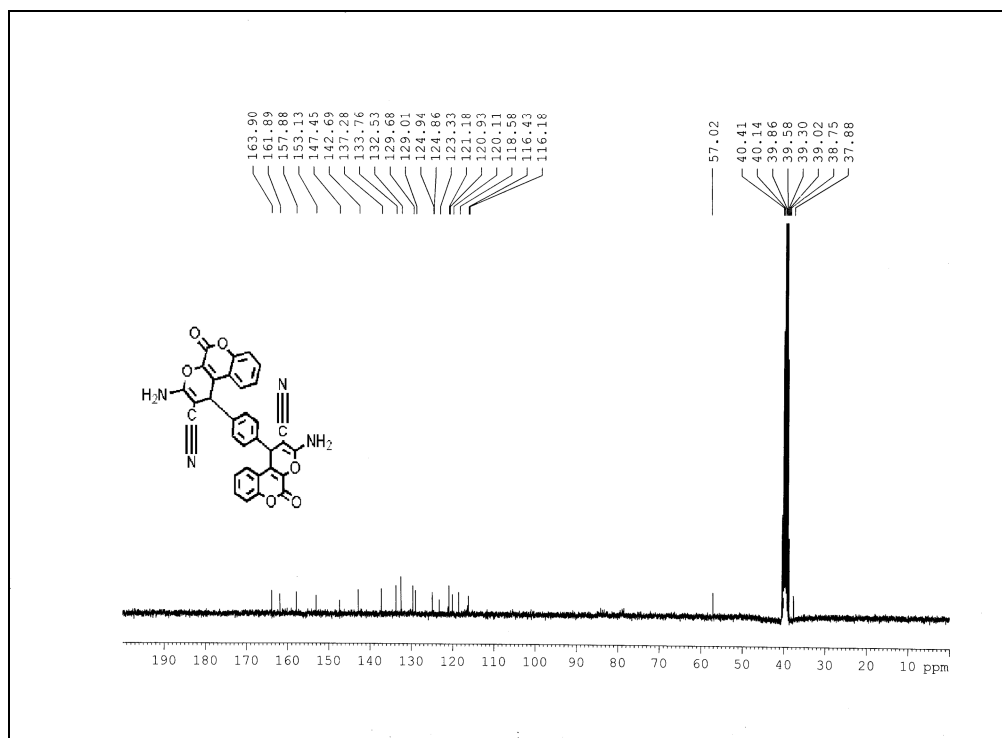

<sup>13</sup>C NMR spectrum of the product 2j

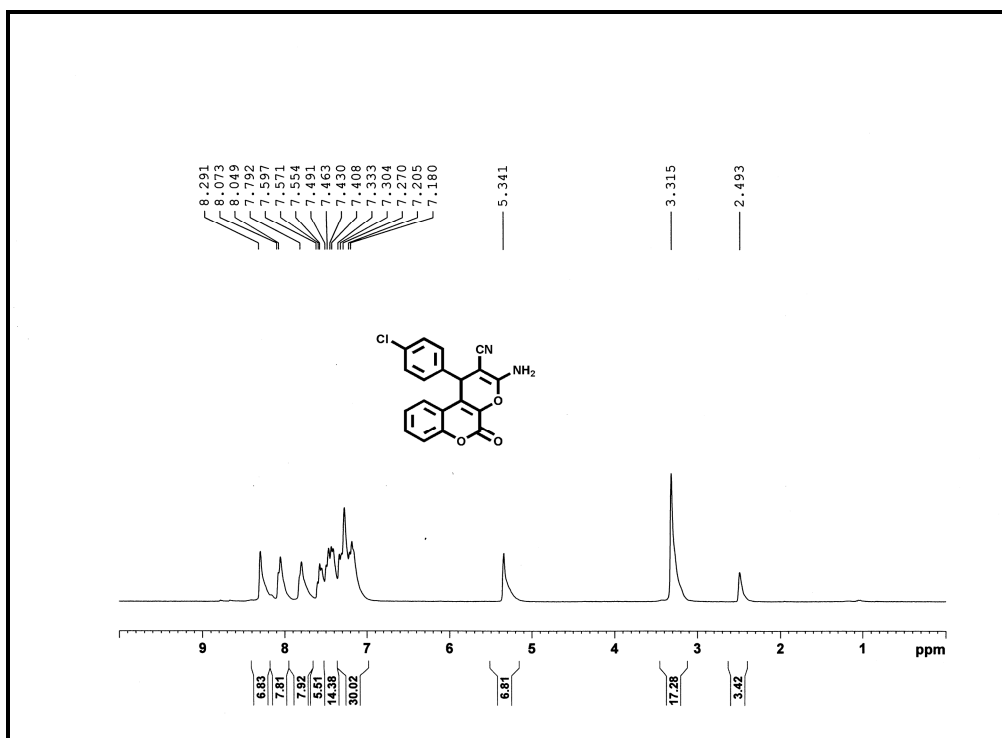

<sup>1</sup>H NMR spectrum of the product 2k

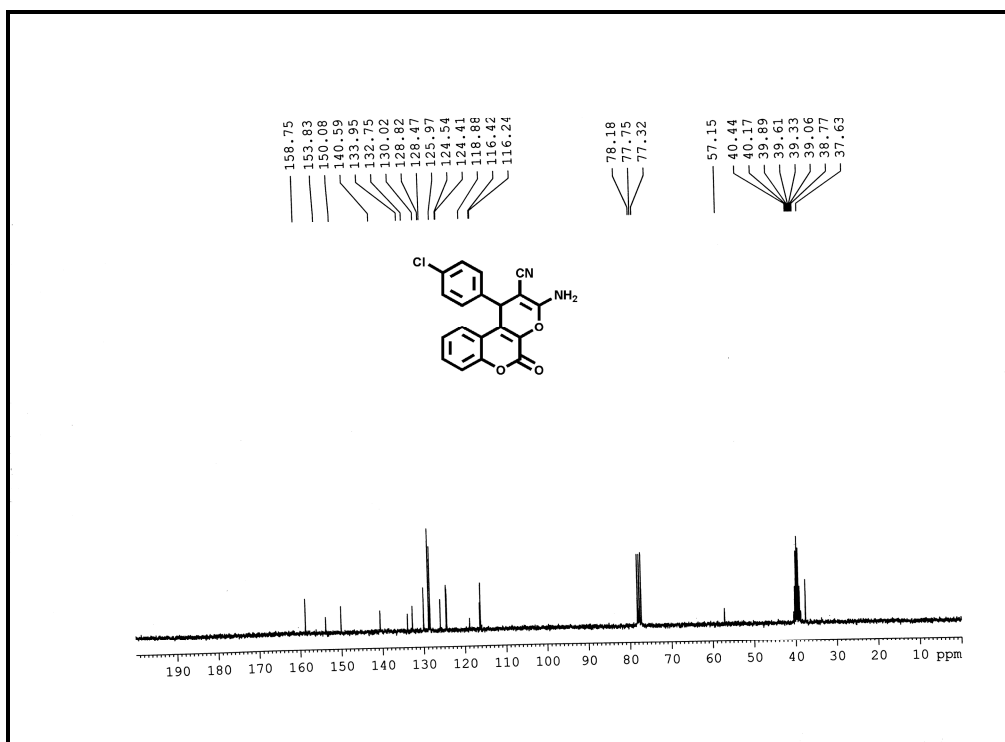

$^{13}\text{C}$  NMR spectrum of the product 2k

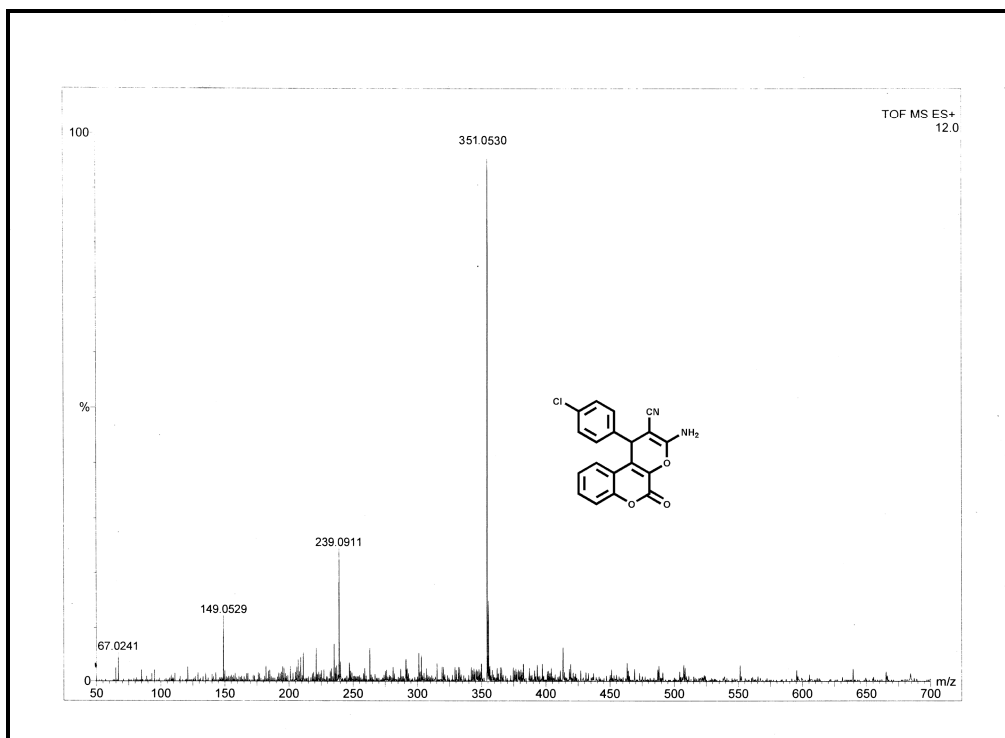

HRMS spectrum of the product 2k

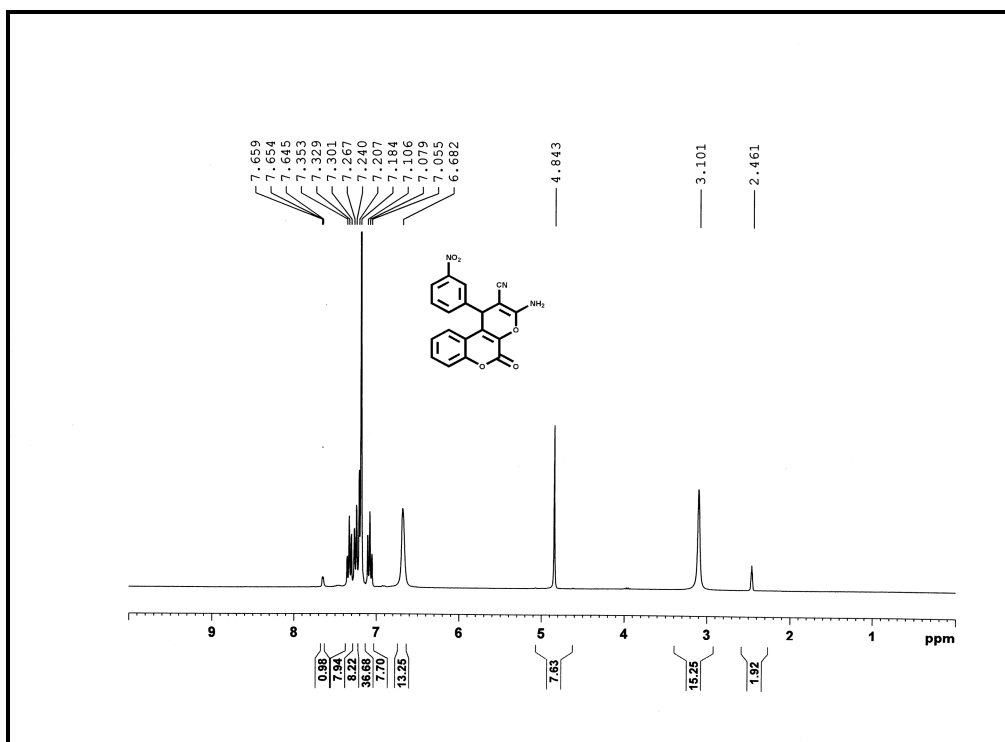

<sup>1</sup>H NMR spectrum of the product **21**

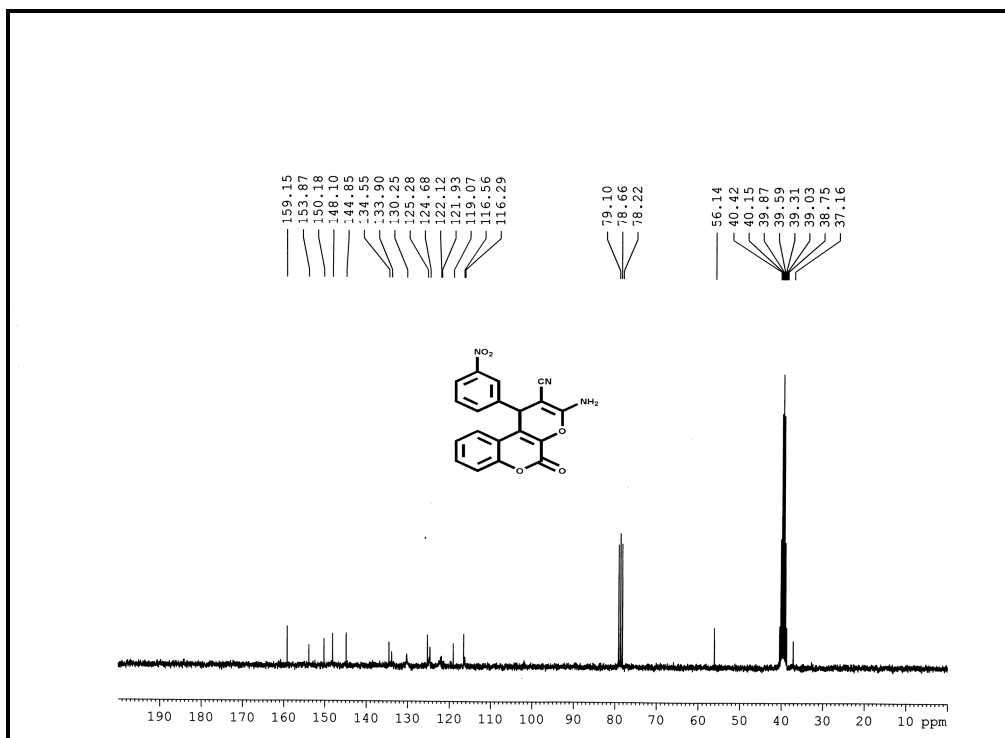

<sup>13</sup>C NMR spectrum of the product **21**

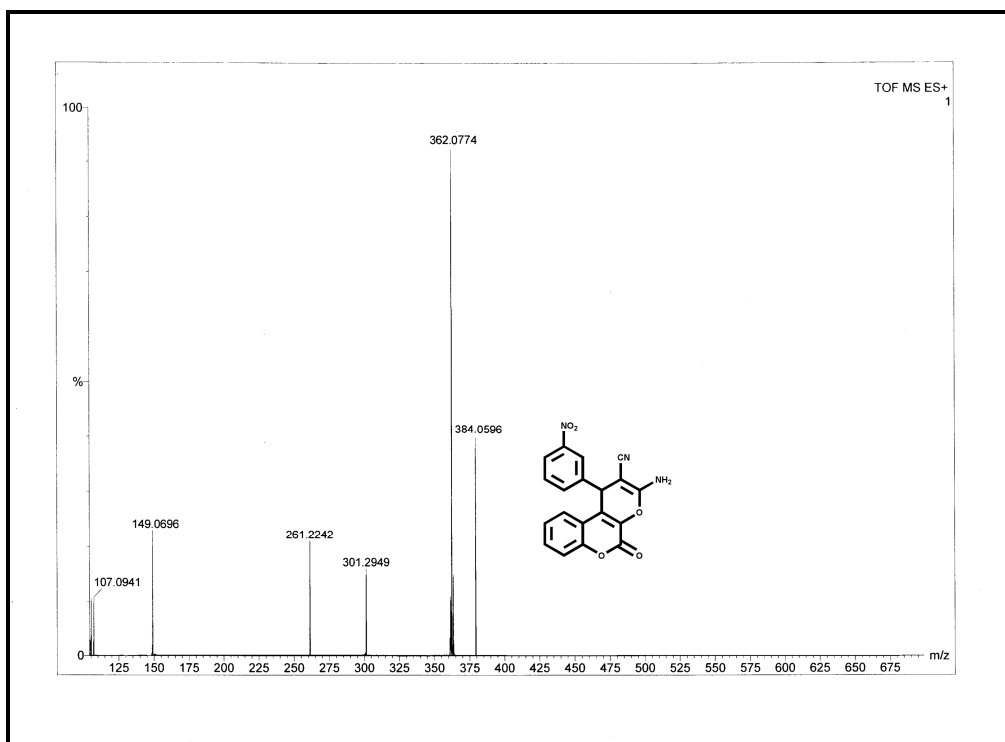

HRMS spectrum of the product 21

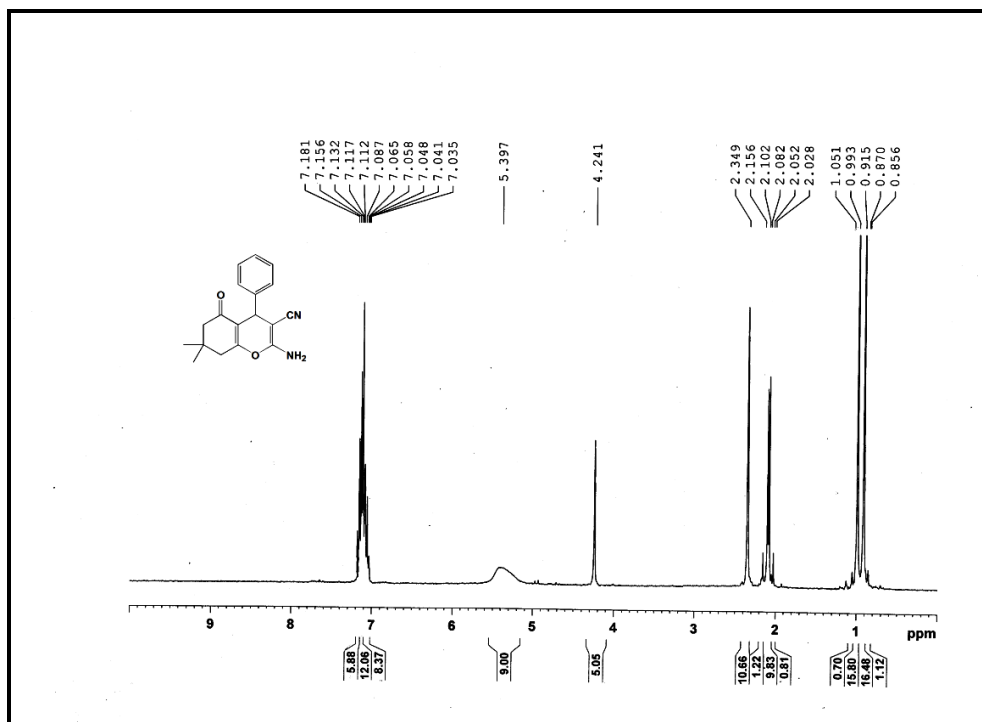

<sup>1</sup>H NMR spectra of compound 3a

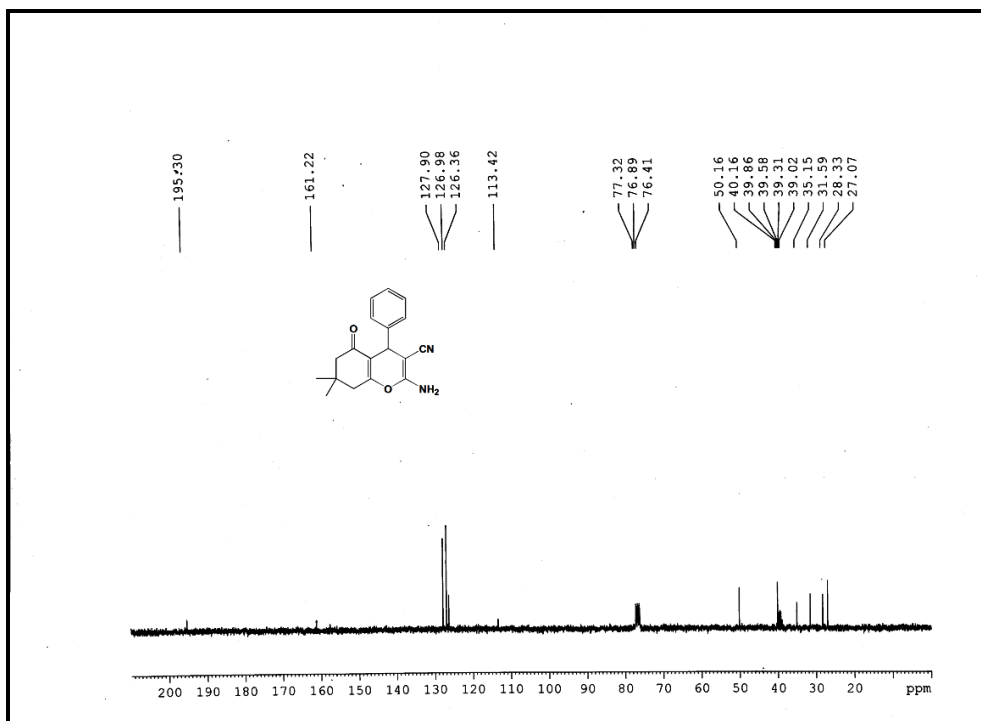

<sup>13</sup>C NMR spectra of compound 3a

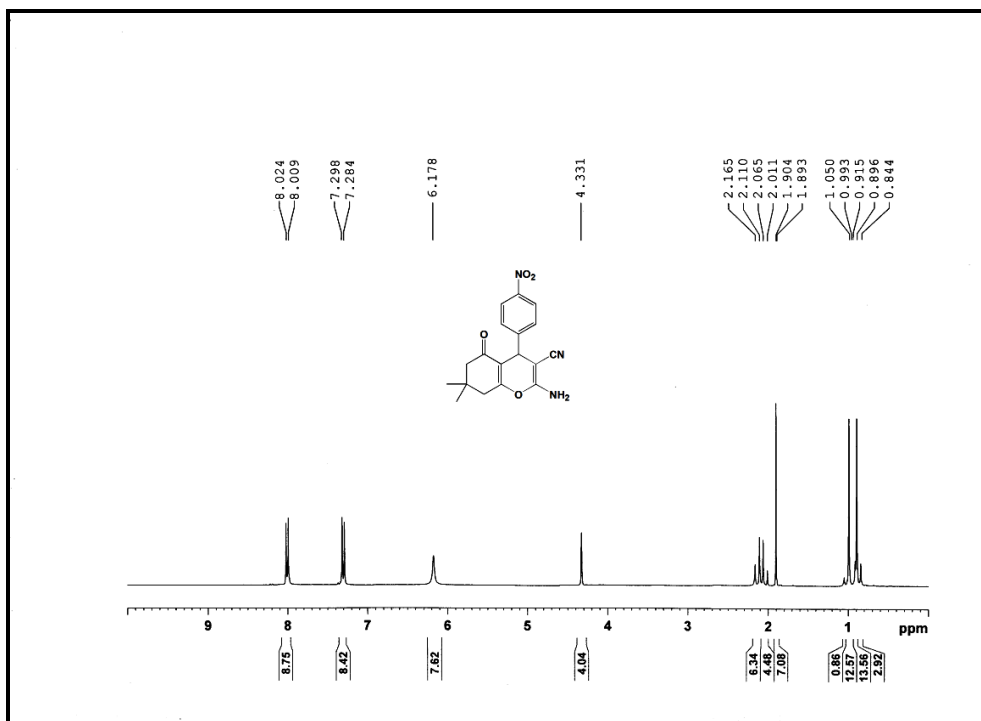

<sup>1</sup>H NMR spectra of compound 3b



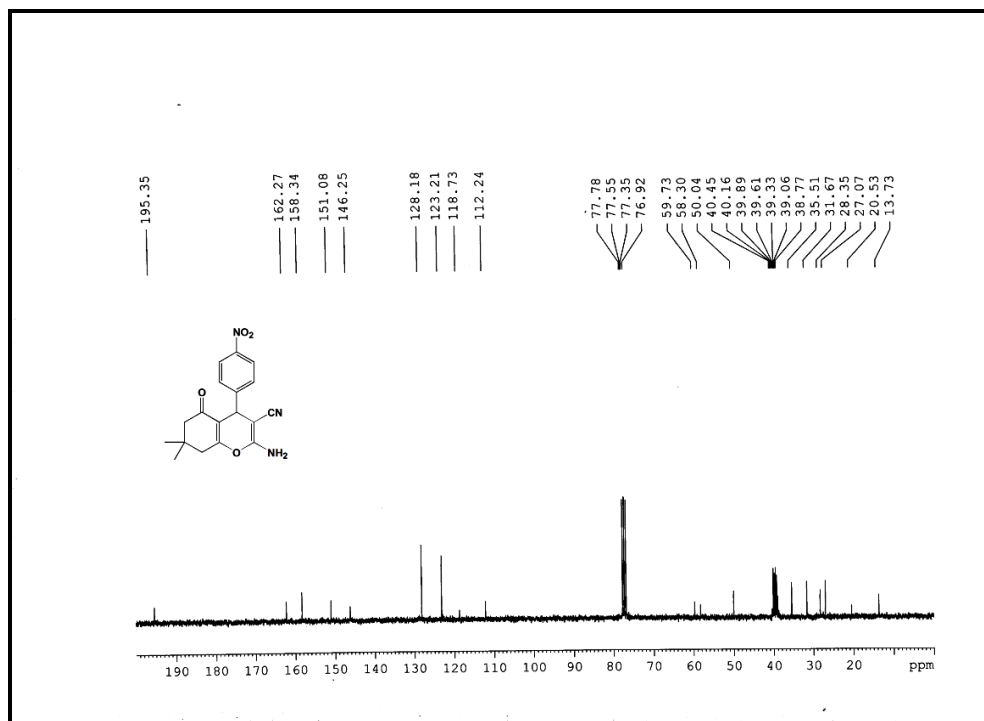

<sup>13</sup>C NMR spectra of compound 3b

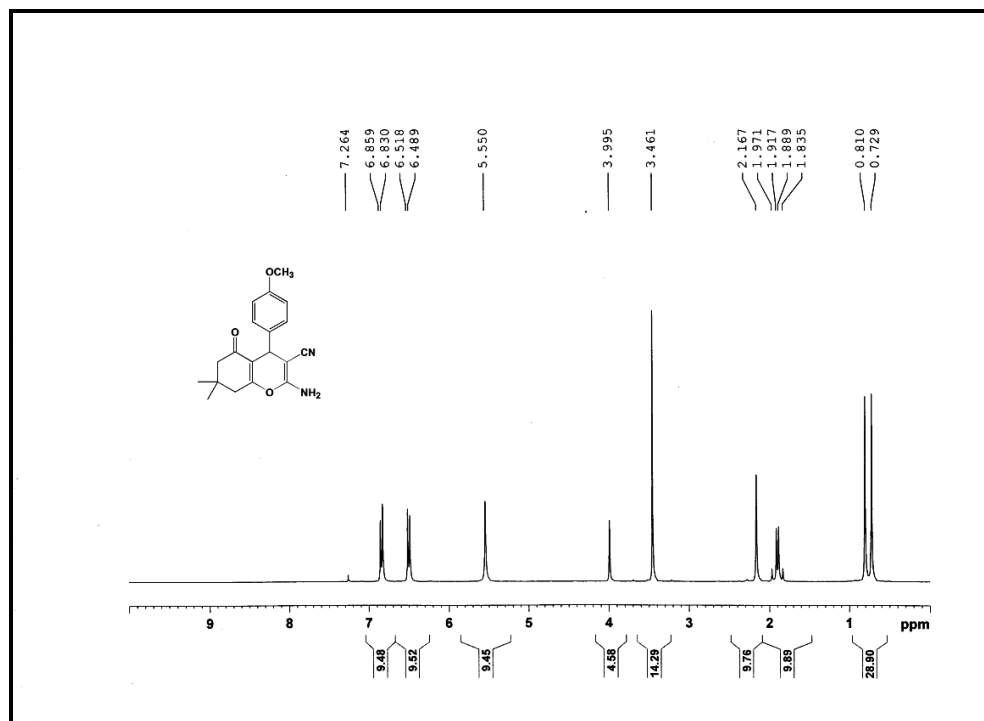

<sup>1</sup>H NMR spectra of compound 3c

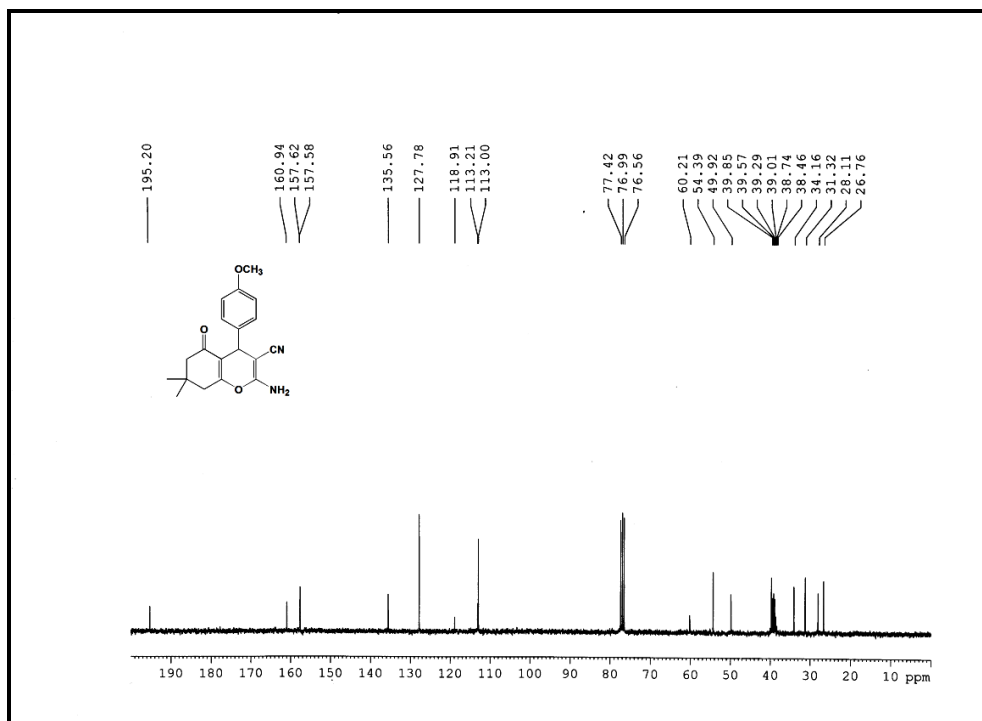

<sup>13</sup>C NMR spectra of compound 3c

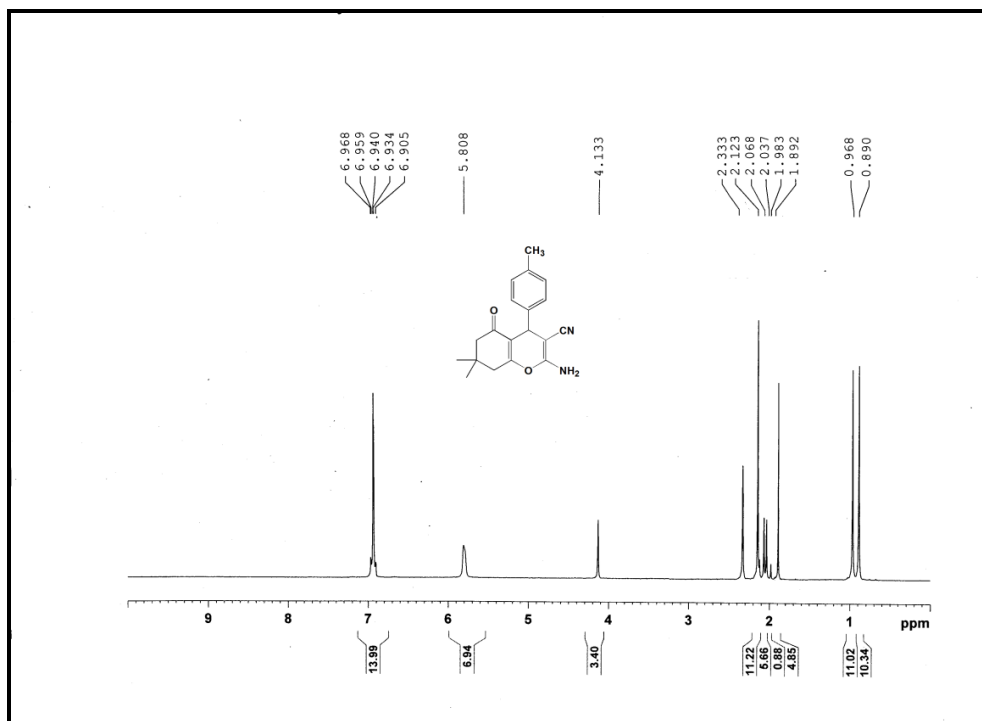

<sup>1</sup>H NMR spectra of compound 3d

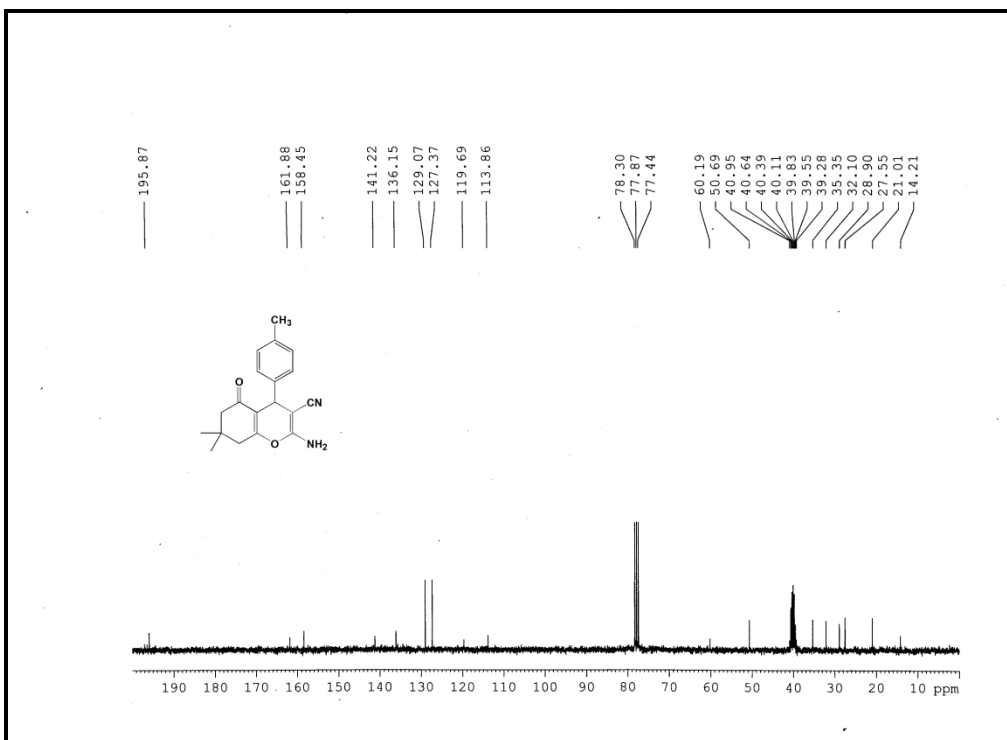

<sup>13</sup>C NMR spectra of compound 3d

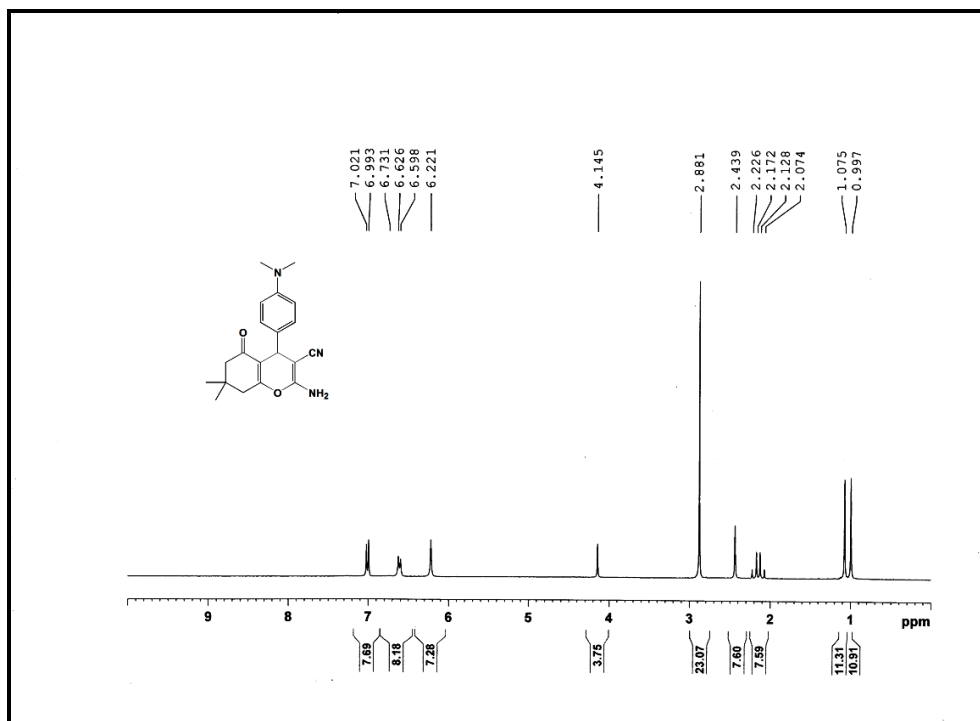

<sup>1</sup>H NMR spectra of compound 3e

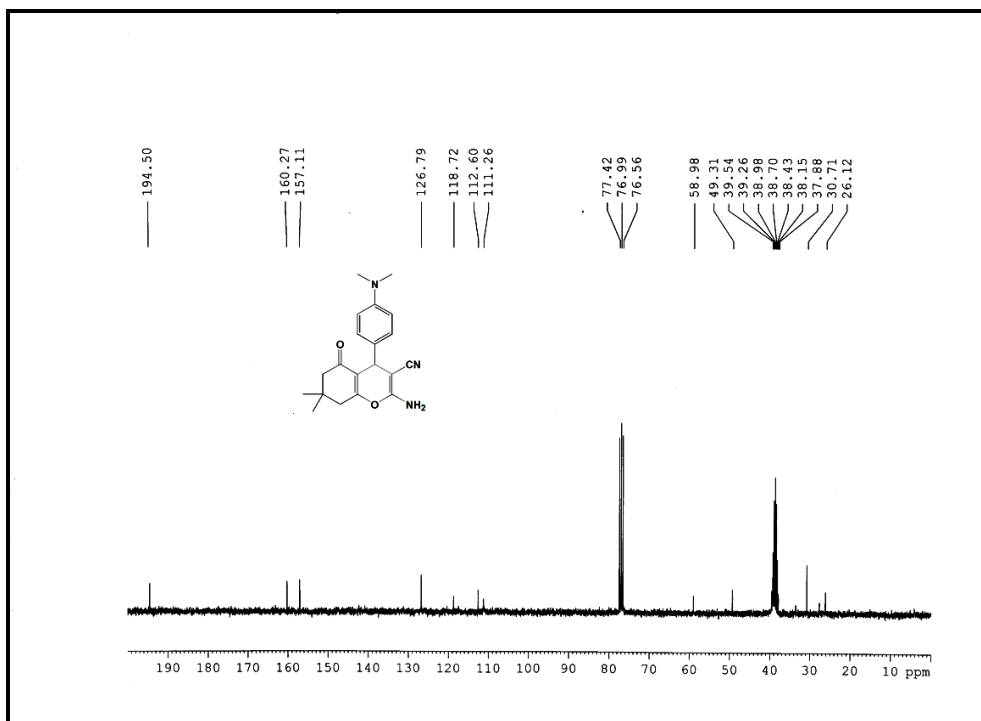

<sup>13</sup>C NMR spectra of compound 3e

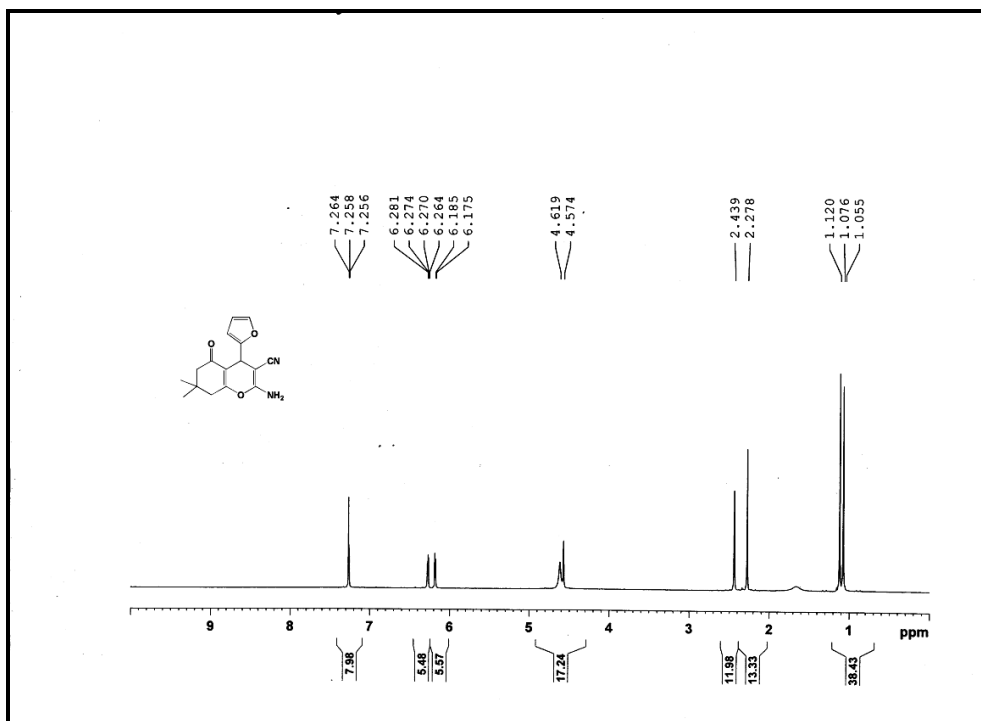

<sup>1</sup>H NMR spectra of compound 3f

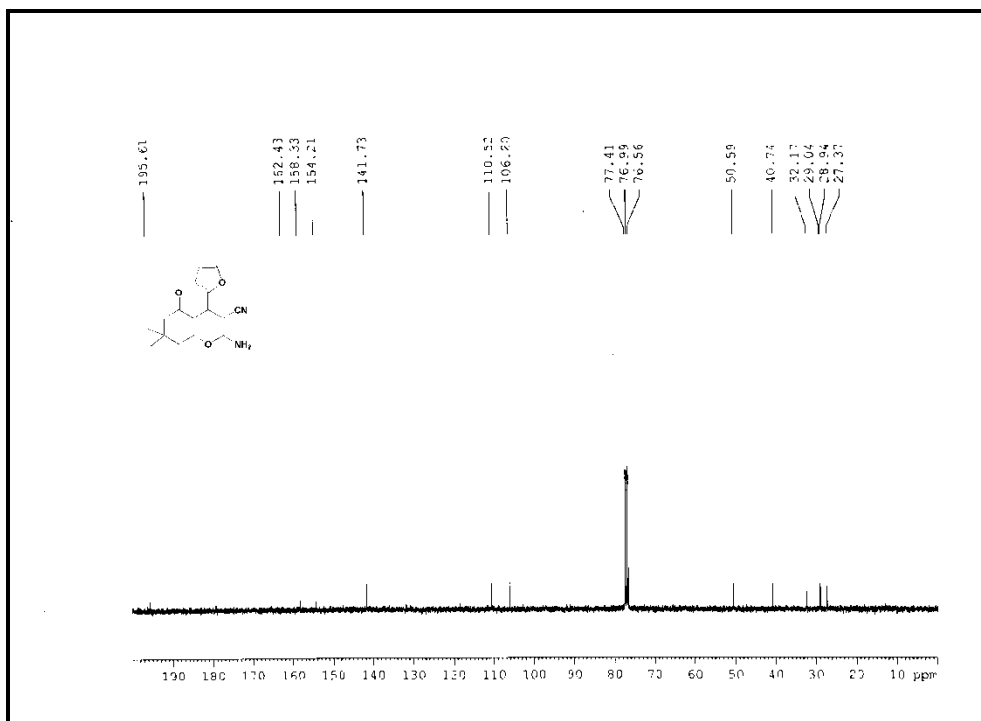

<sup>13</sup>C NMR spectra of compound 3f

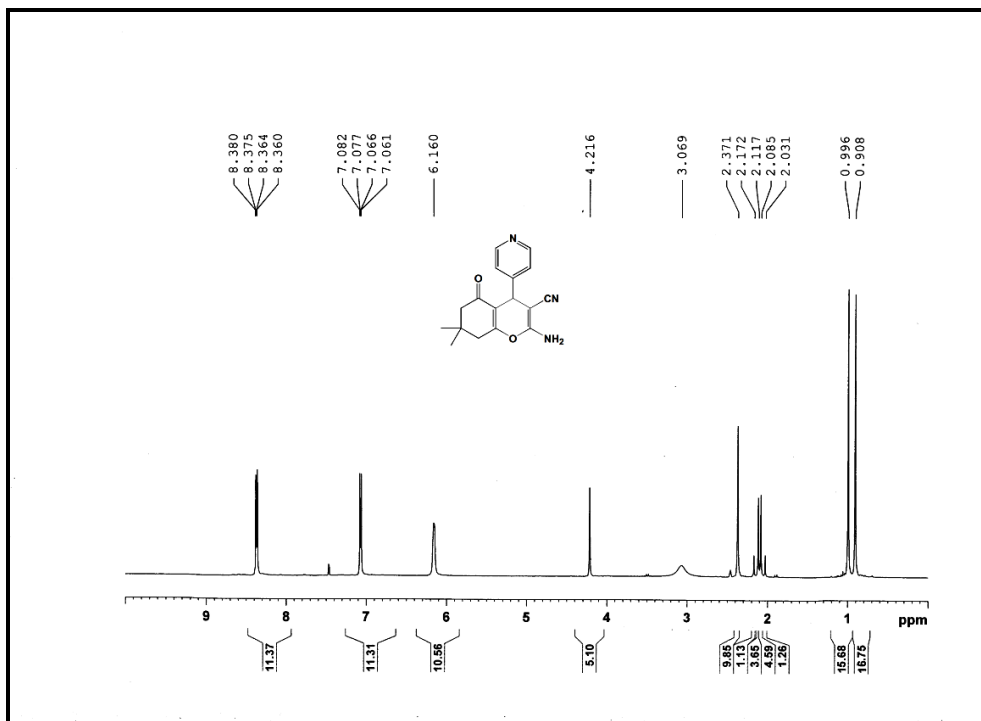

<sup>1</sup>H NMR spectra of compound 3g

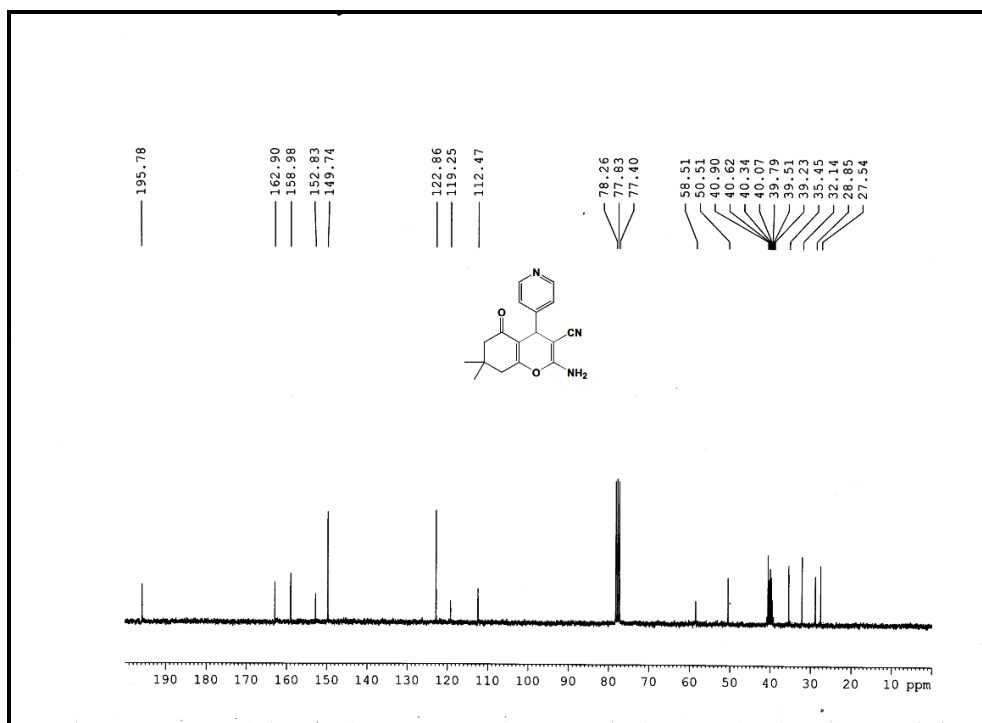

<sup>13</sup>C NMR spectra of compound 3g

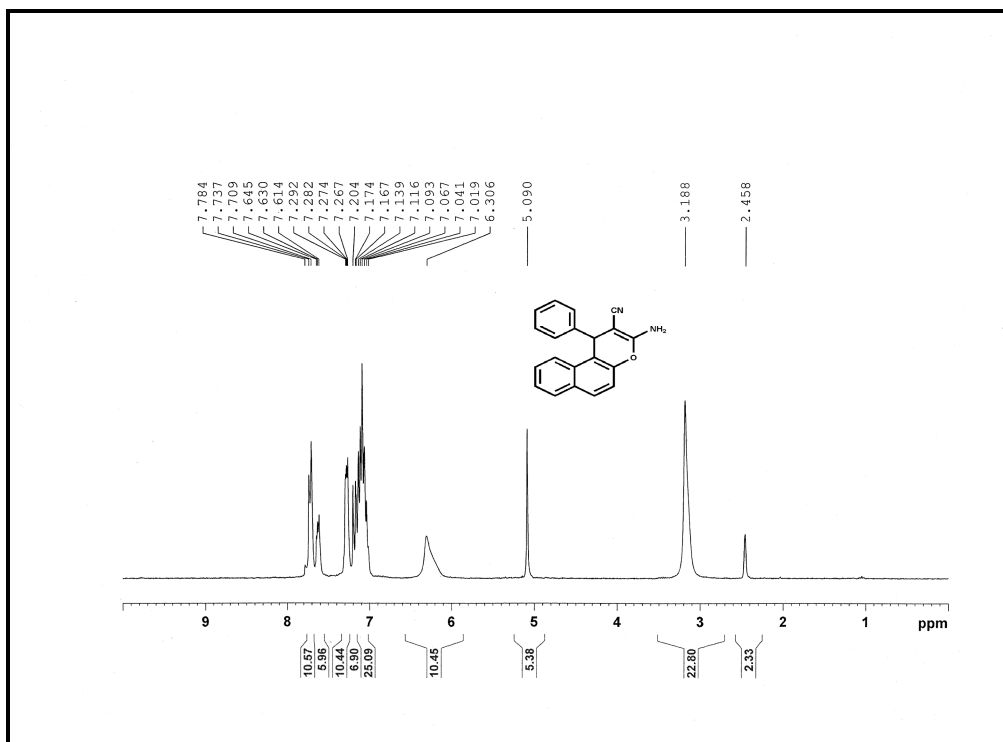

<sup>1</sup>H NMR spectra of compound 4a

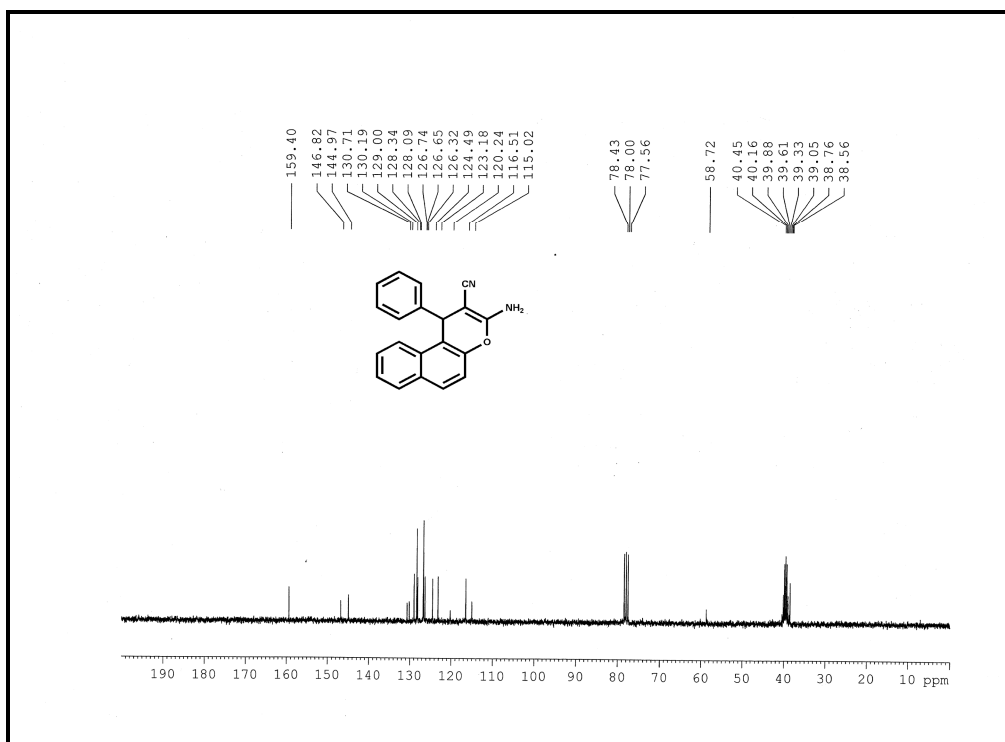

<sup>13</sup>C NMR spectra of compound 4a

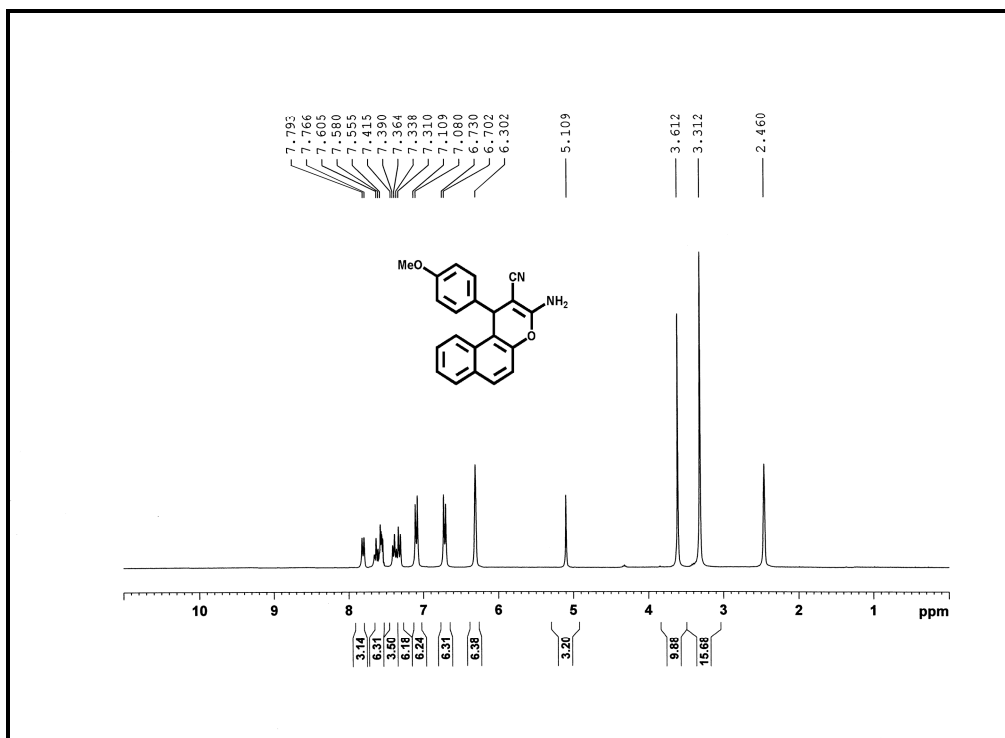

<sup>1</sup>H NMR spectra of compound 4b

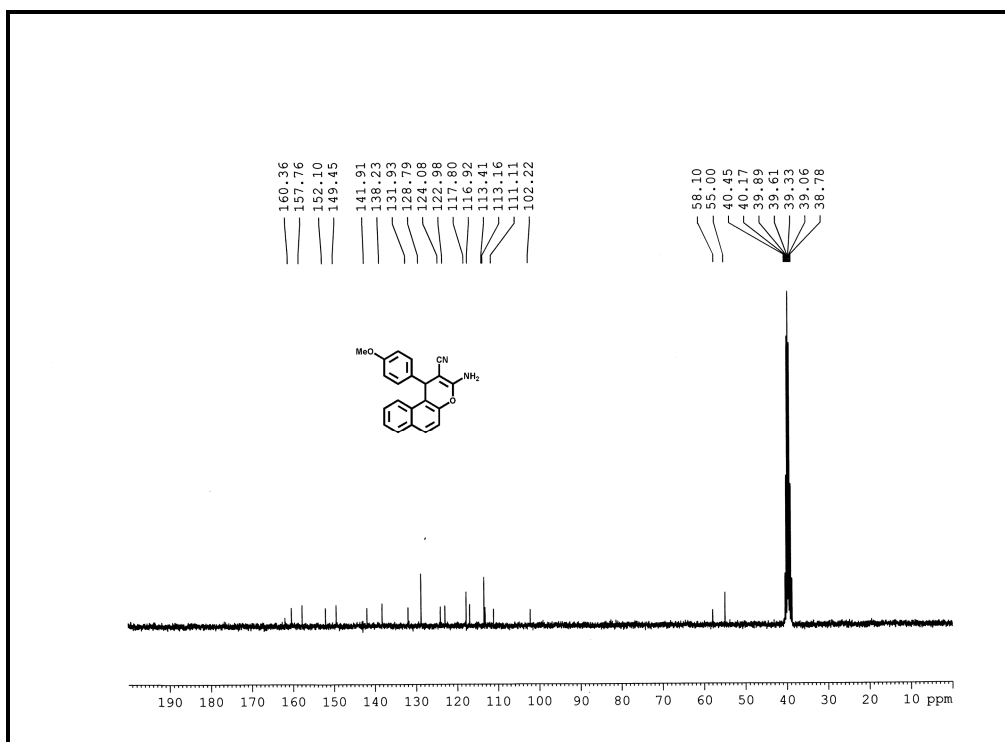

<sup>13</sup>C NMR spectra of compound 4b

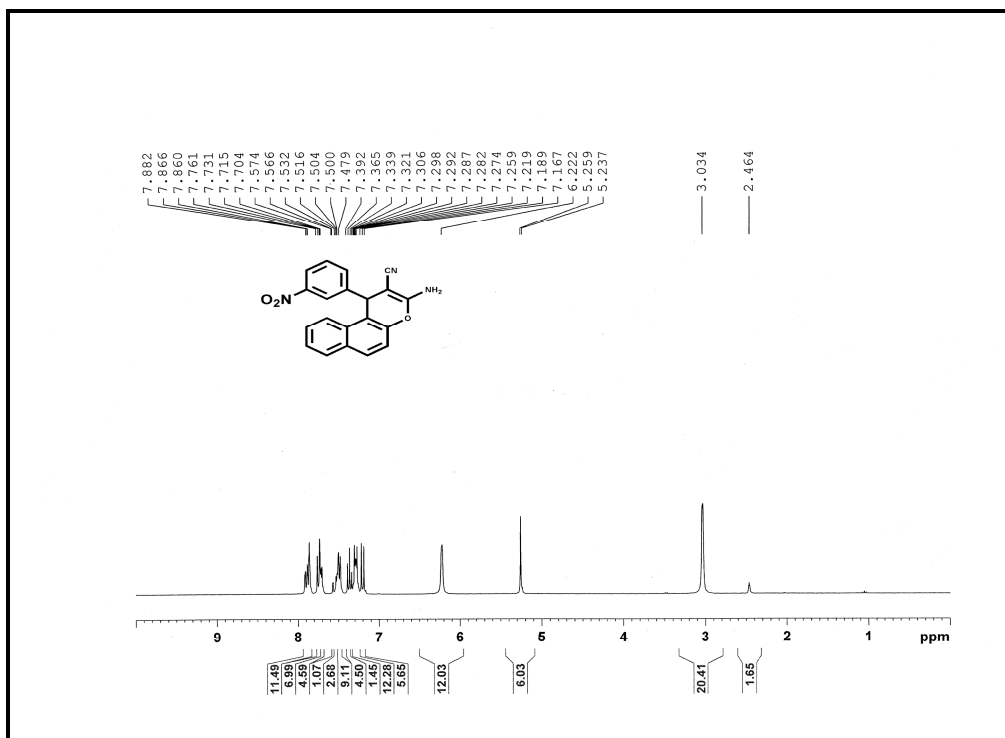

<sup>1</sup>H NMR spectra of compound 4c



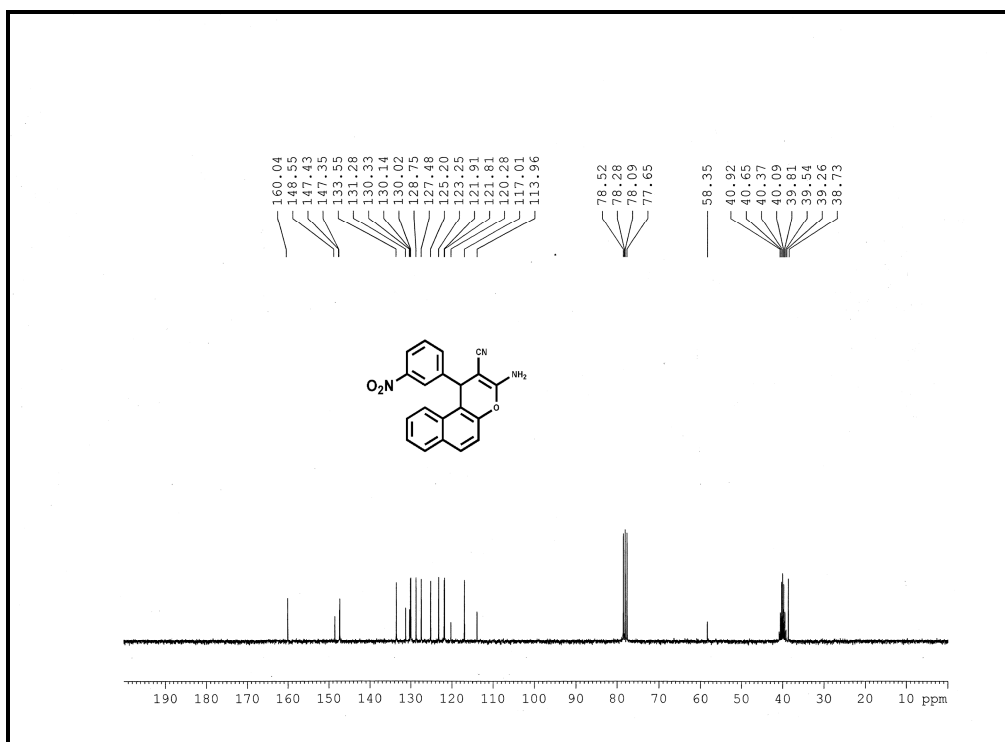

<sup>13</sup>C NMR spectra of compound 4c

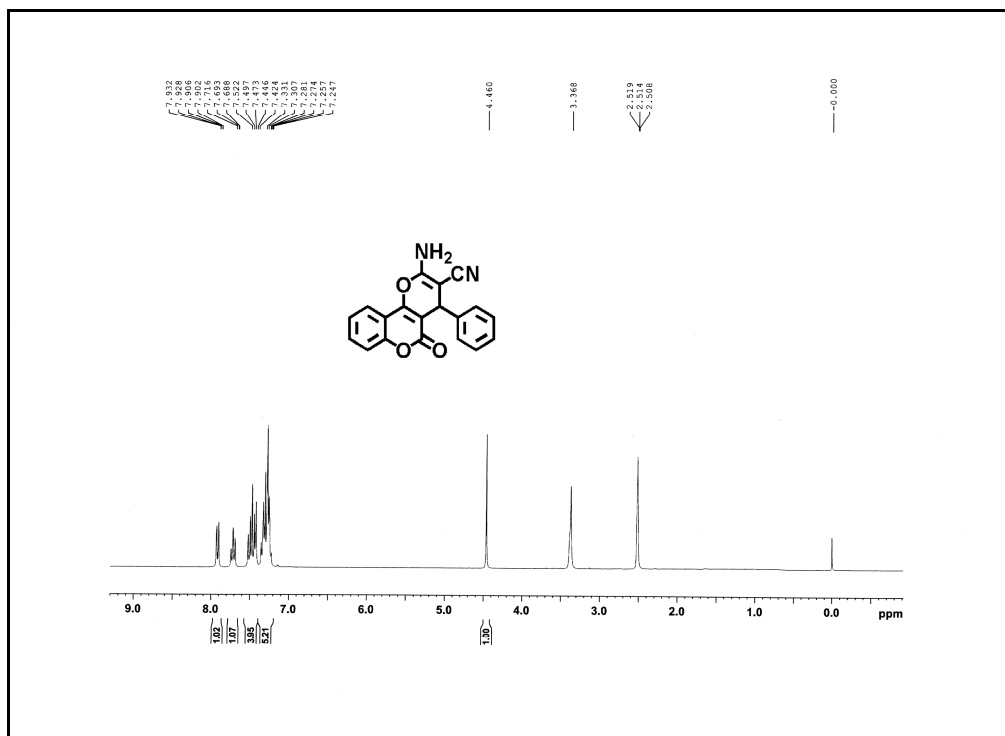

<sup>1</sup>H NMR spectra of compound 5a

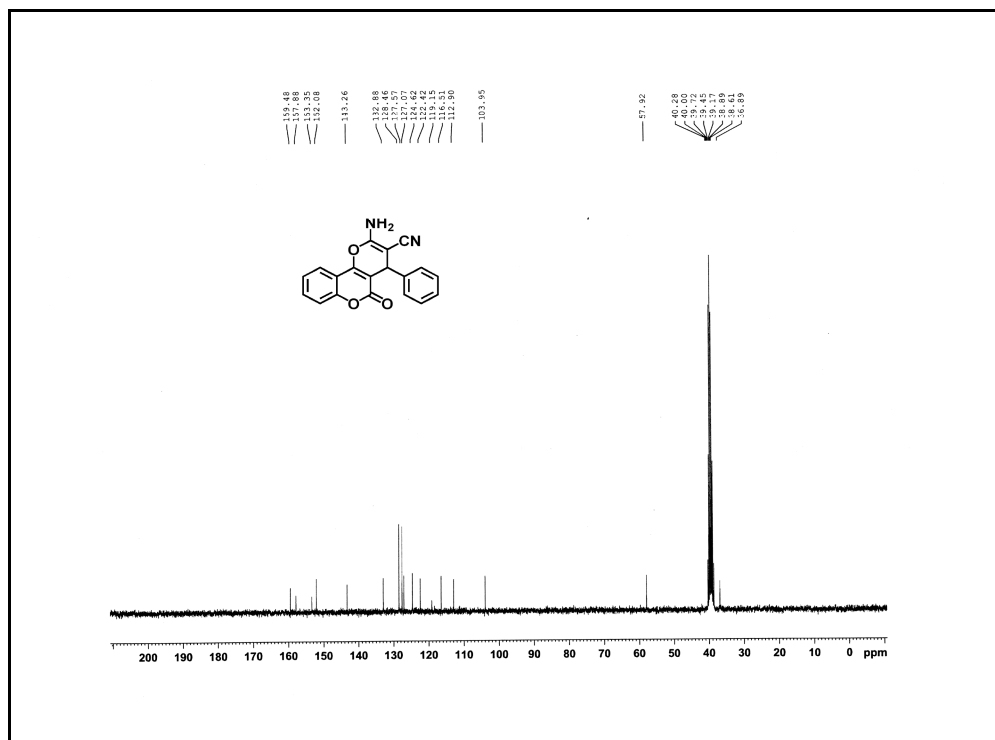

<sup>13</sup>C NMR spectra of compound **5a**

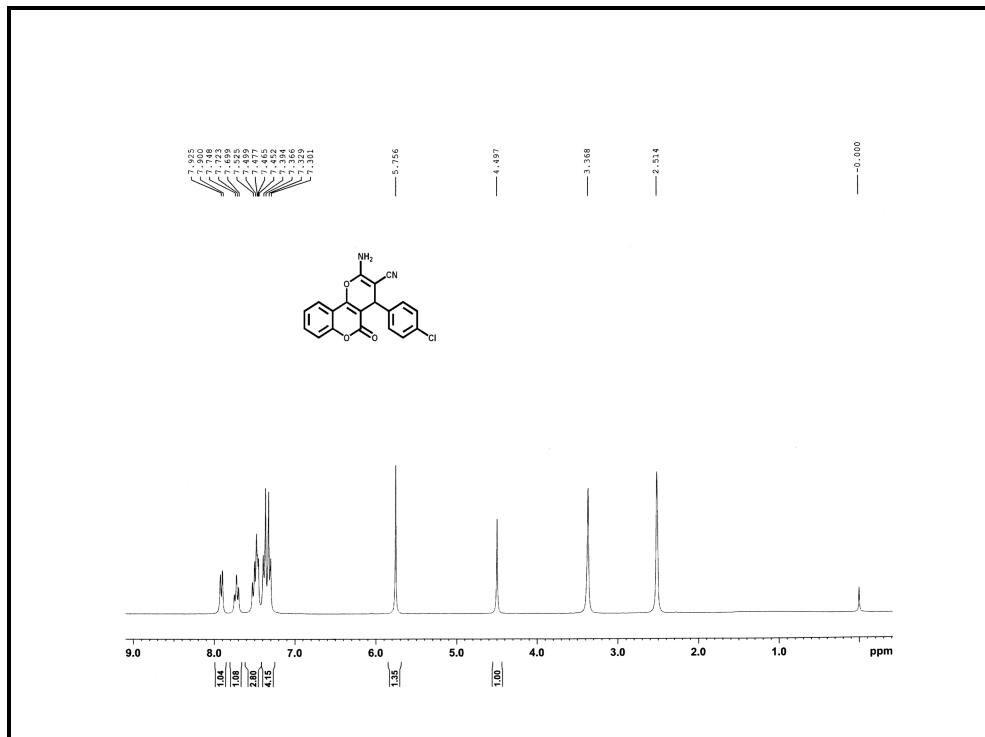

<sup>1</sup>H NMR spectra of compound **5b**

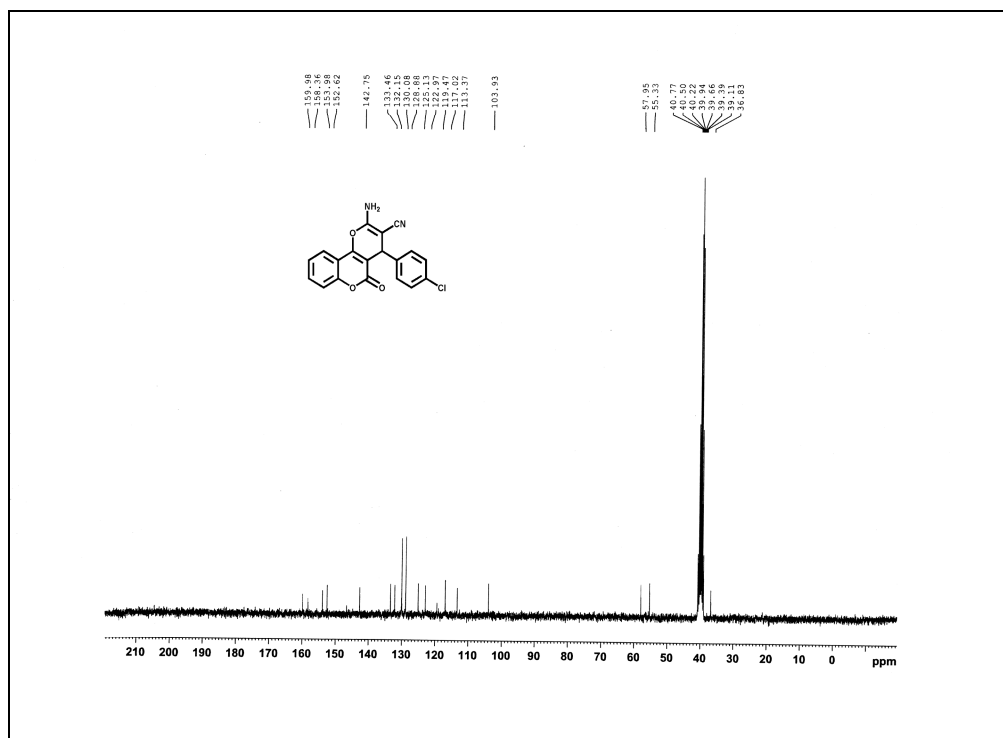

<sup>13</sup>C NMR spectra of compound **5b**

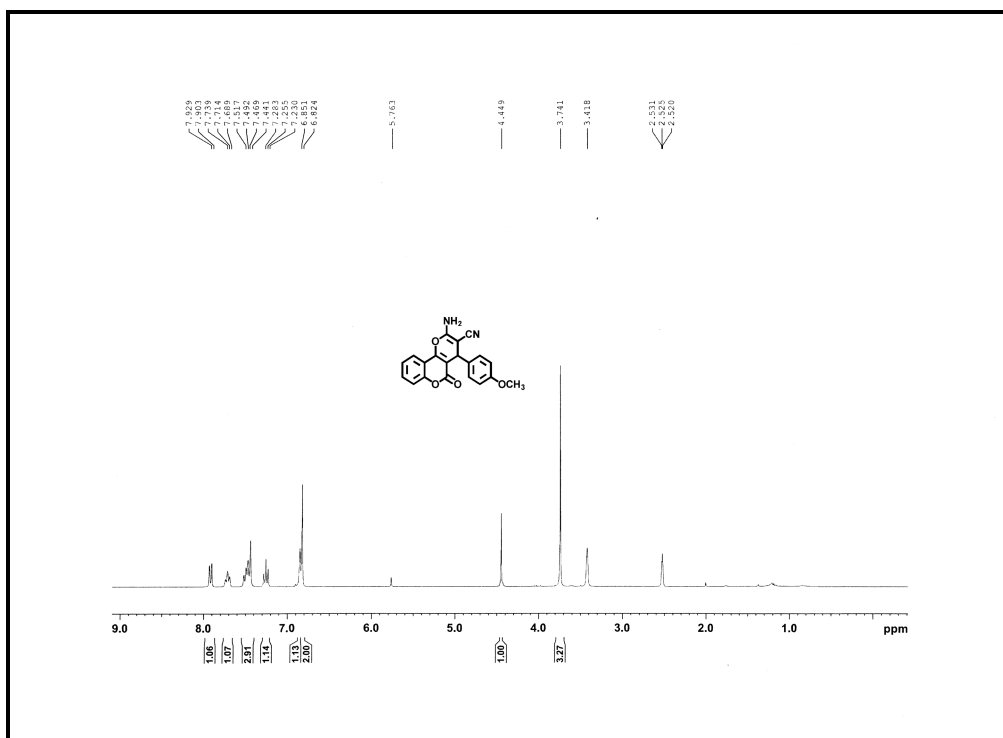

<sup>1</sup>H NMR spectra of compound **5c**

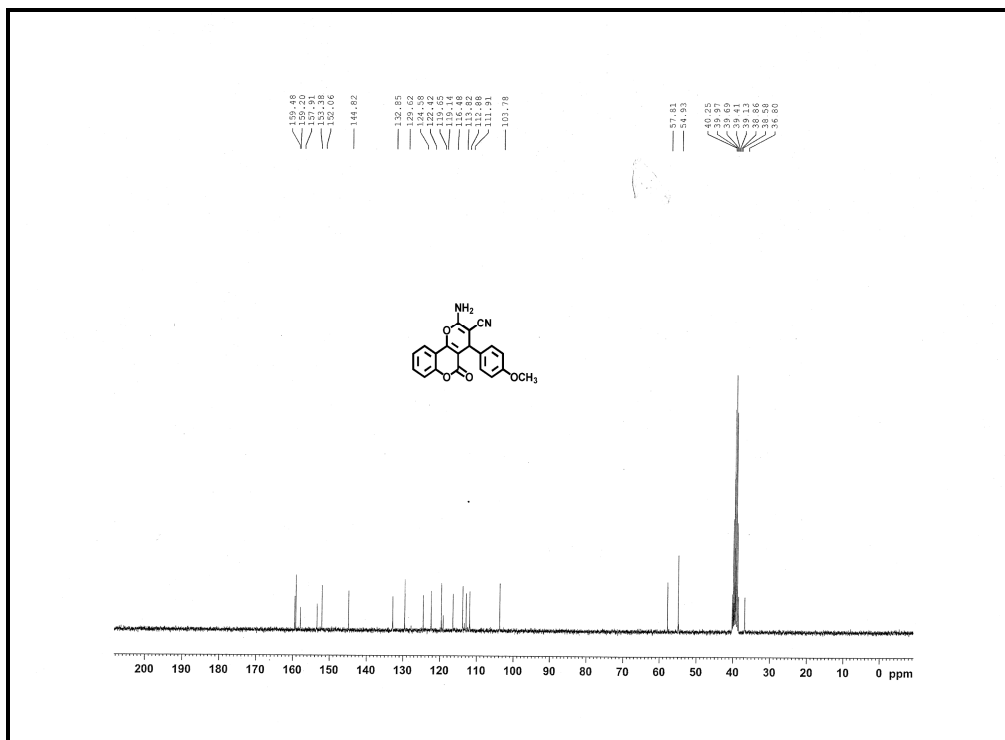

<sup>13</sup>C NMR spectra of compound 5c

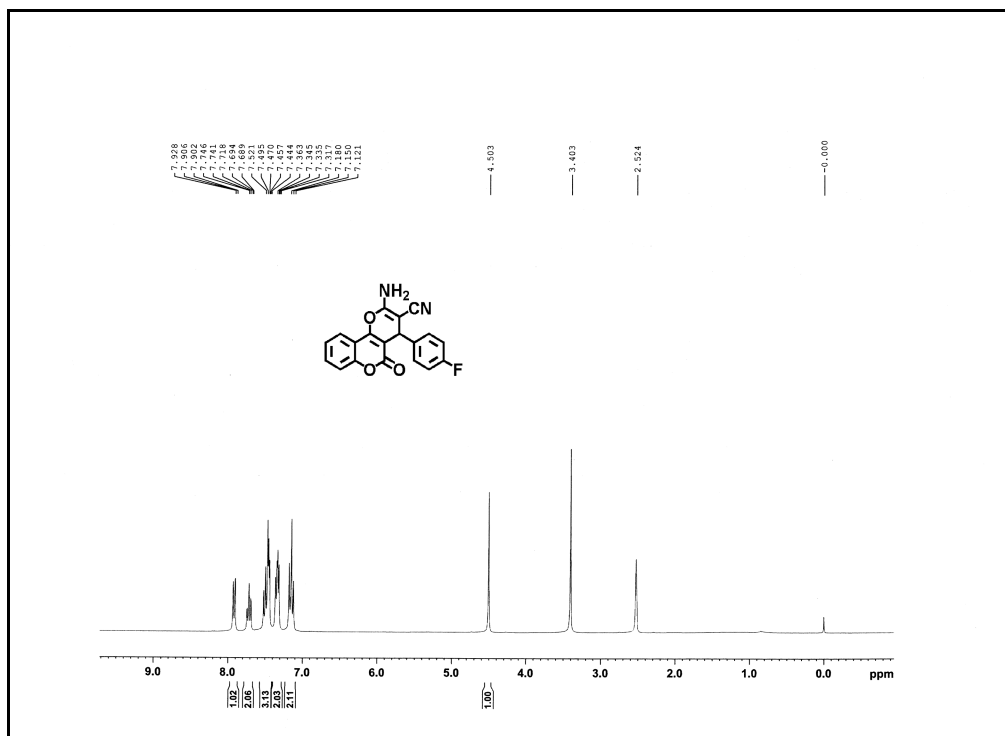

<sup>1</sup>H NMR spectra of compound 5d



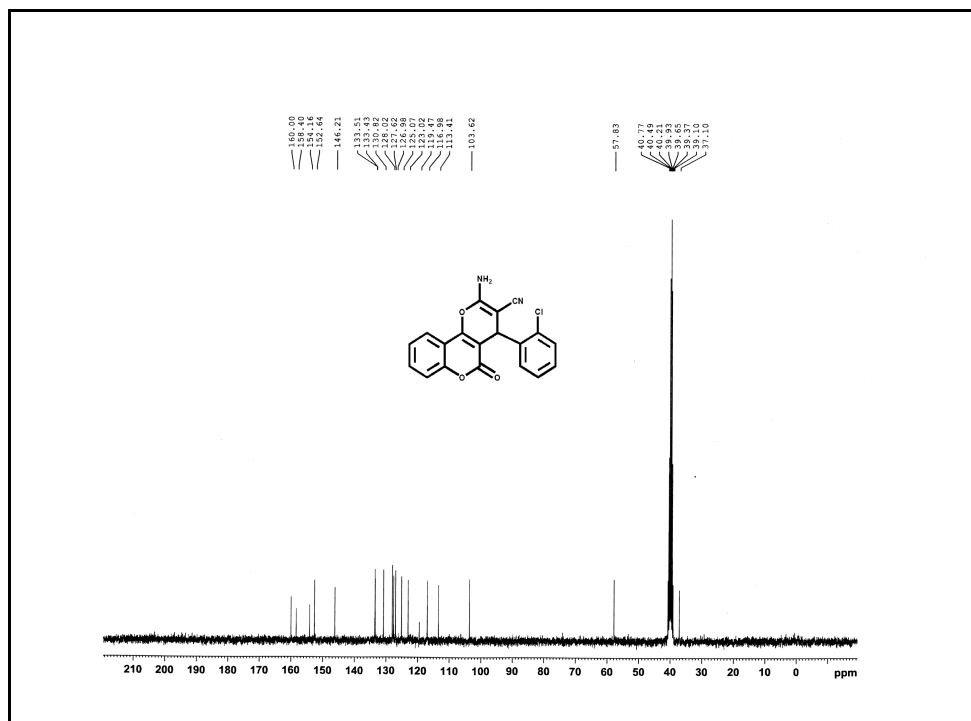

<sup>13</sup>C NMR spectra of compound 5e

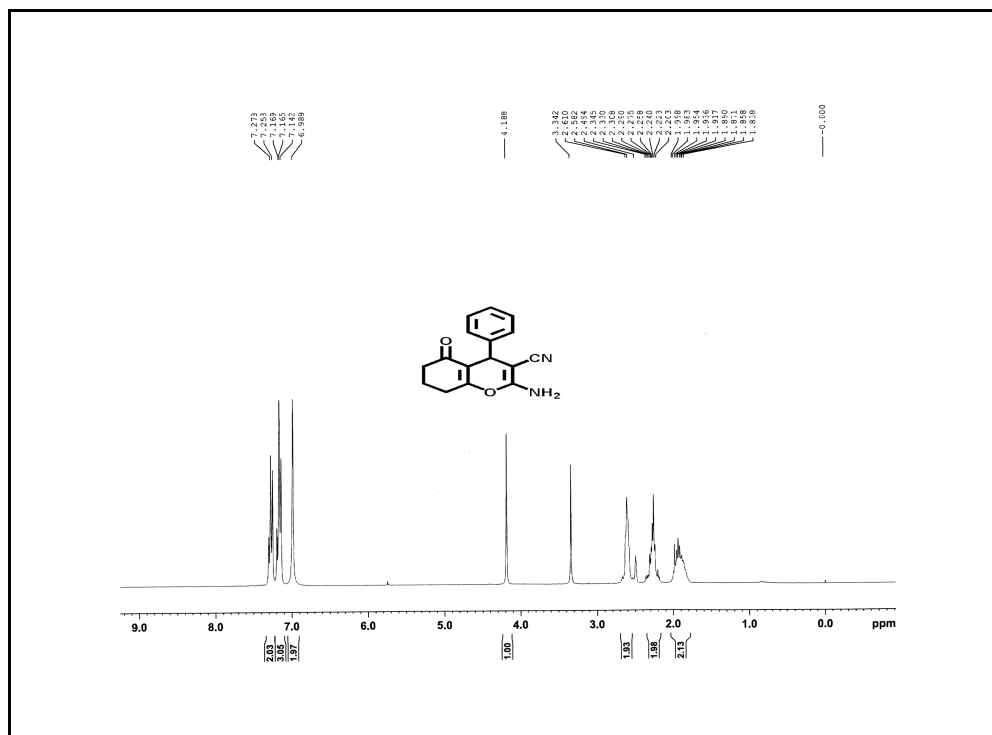

<sup>1</sup>H NMR spectra of compound 6a

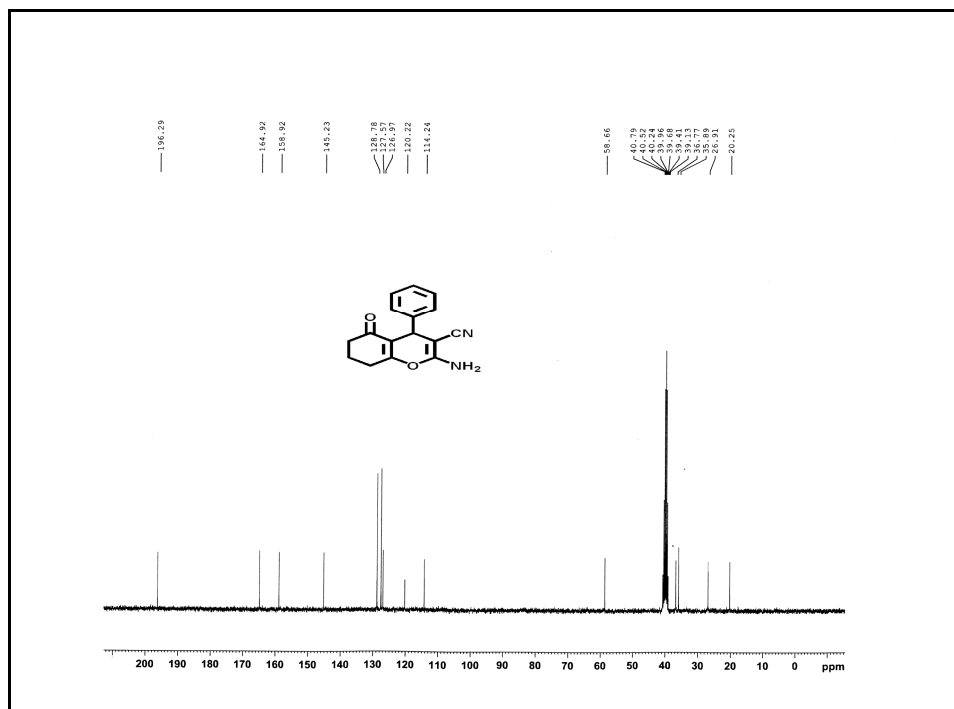

<sup>13</sup>C NMR spectra of compound 6a

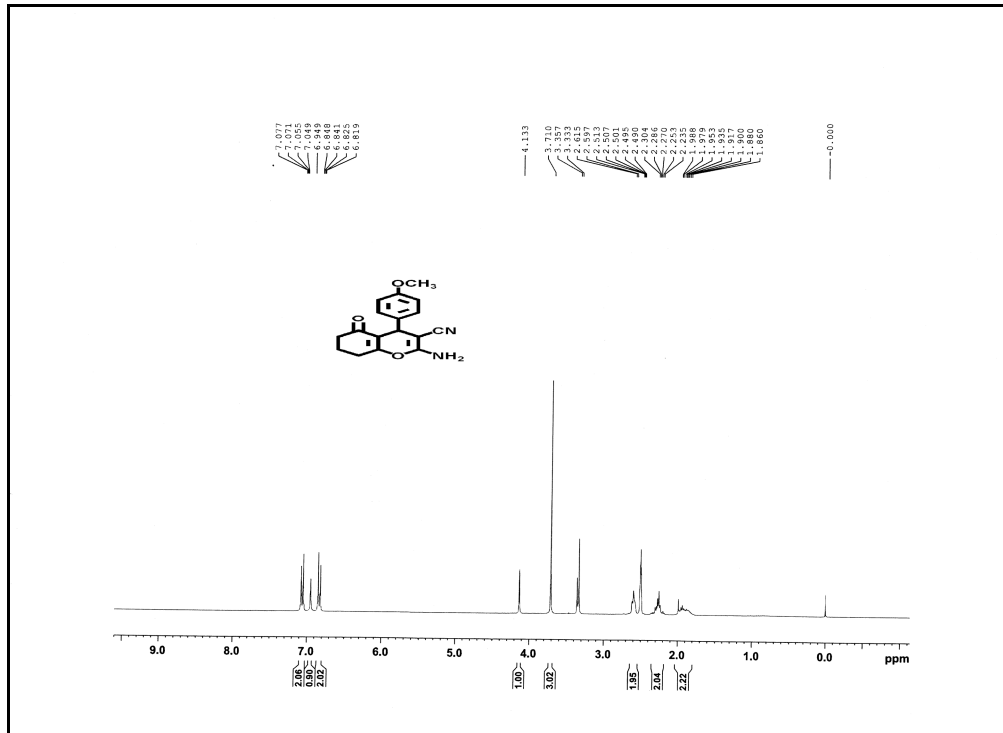

<sup>1</sup>H NMR spectra of compound 6b

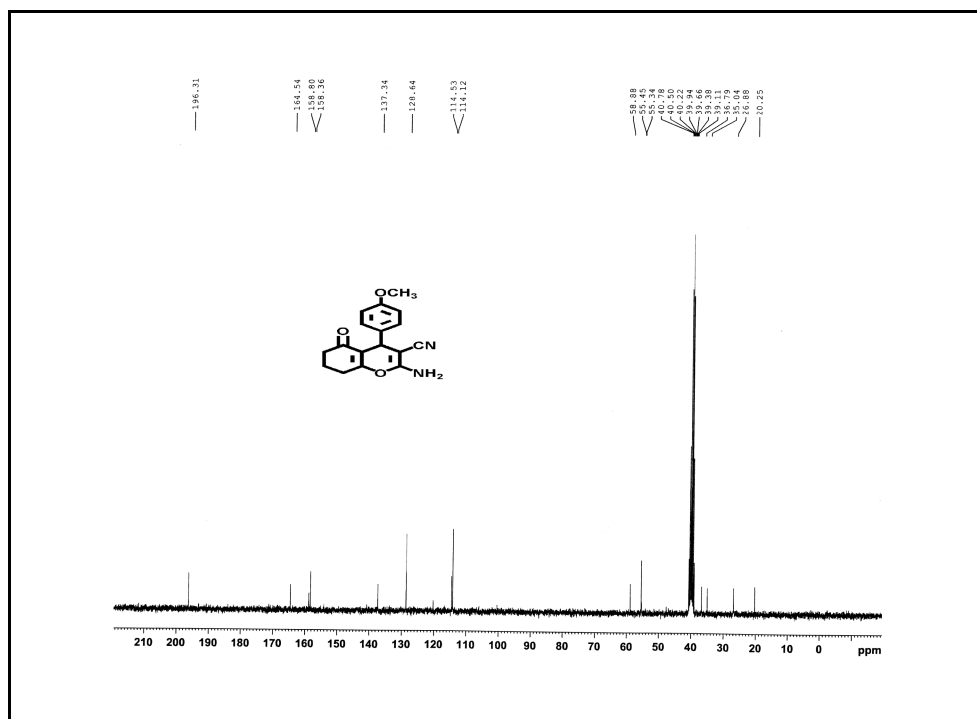

<sup>13</sup>C NMR spectra of compound 6b

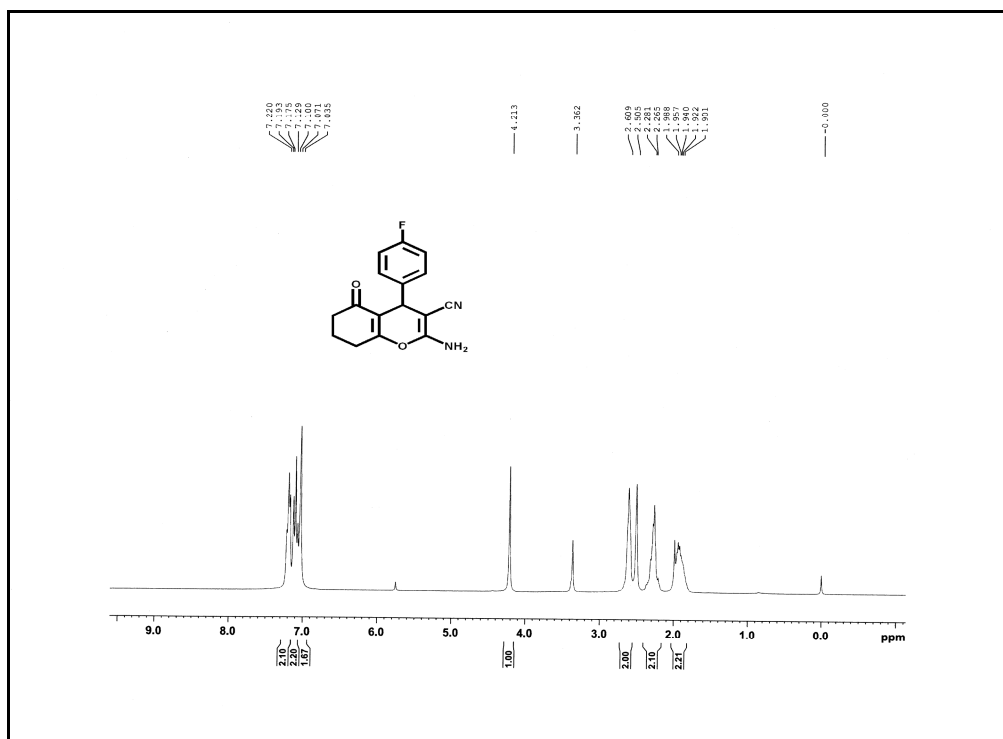

<sup>1</sup>H NMR spectra of compound 6c



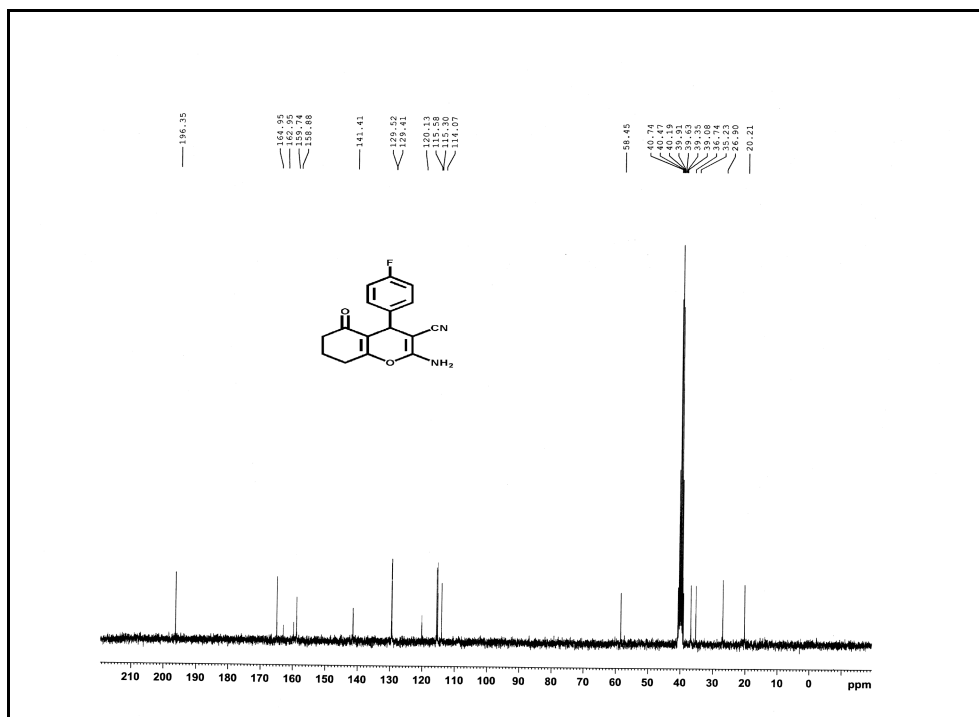

<sup>13</sup>C NMR spectra of compound 6c

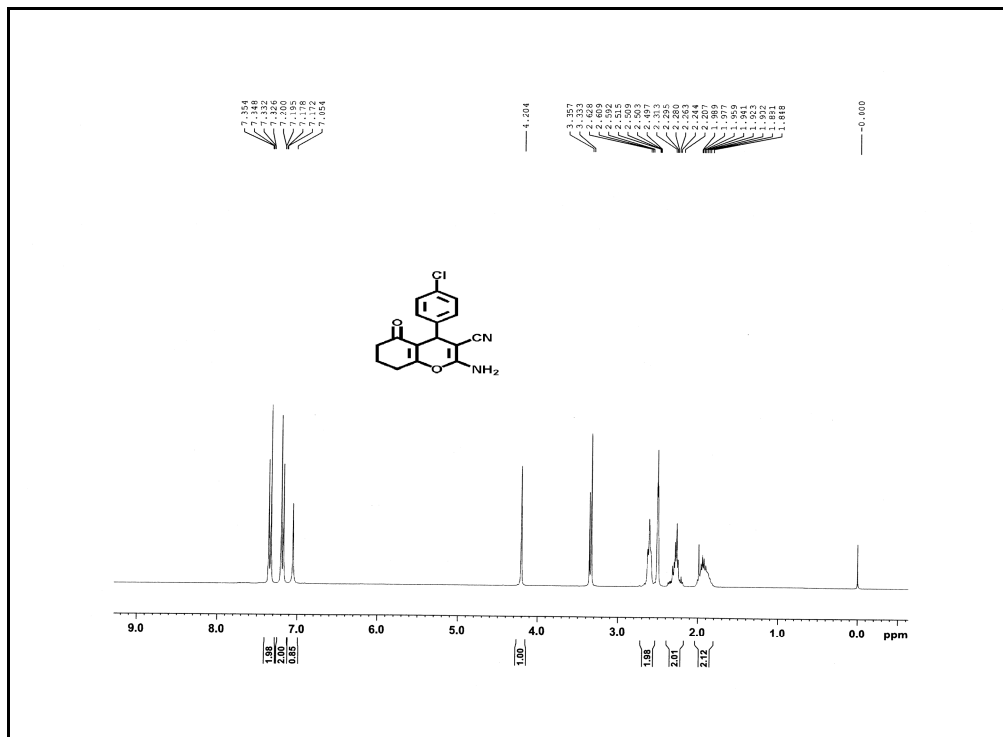

<sup>1</sup>H NMR spectra of compound 6d

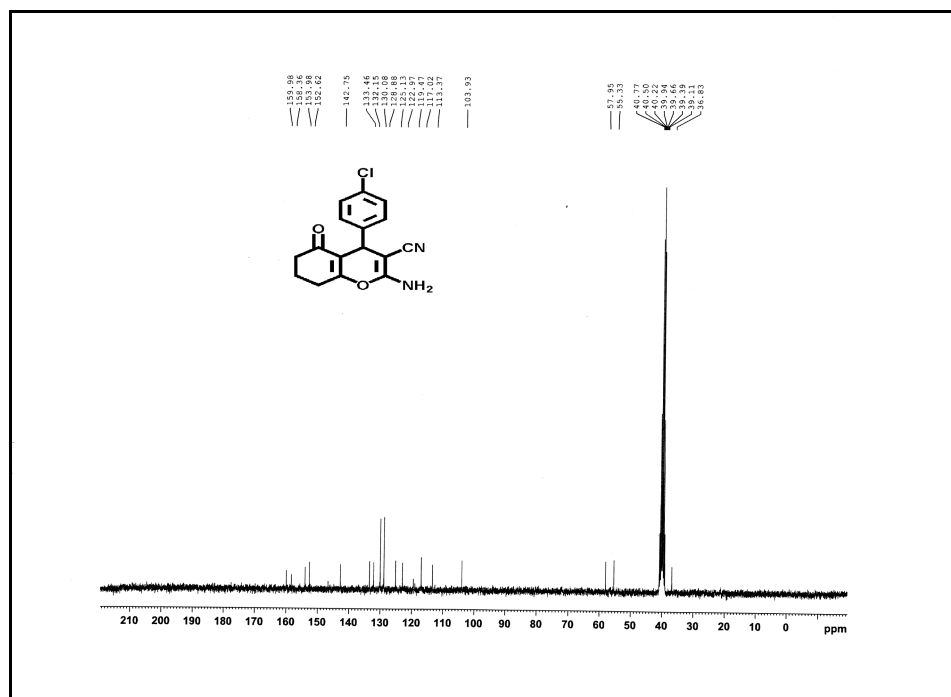

$^{13}\text{C}$  NMR spectra of compound 6d
